# Supplementary material for: Understanding the second and third order nonlinear optical responses of M@b66/64Al12N12: a comprehensive DFT and TD-DFT study
Source: Royal Society of Chemistry journal article supplement (doi:10.1039/d4nj01849d), 2024-01-01
Supplement: d4nj01849d1.pdf [file d4nj01849d1.pdf]

## Supplementary Information

### Understanding the Second & Third Order Nonlinear Optical Responses of $M@b_{64}/b_{66}Al_{12}N_{12}$ nanoparticles: A Comprehensive DFT and TD-DFT Study

Meriem Zaidi<sup>a,b</sup>, Douniazed Hannachi\*<sup>c,d</sup>, Nahla Chaoui<sup>a</sup>, Henry Chermette\*<sup>e</sup>

<sup>a</sup>. Département de Chimie, Faculté des Sciences, Université Ferhat Abbas, Setif-1, Algérie.

<sup>b</sup>. Laboratoire de Chimie, Ingénierie Moléculaire et Nanostructures (LCIMN), Université Ferhat Abbas Sétif 1, Sétif 19000, Algérie.

<sup>c</sup>. Laboratoire d'Électrochimie, d'Ingénierie Moléculaire et de Catalyse Redox (LEIMCR), Département d'Enseignement de Base en Technologie, Faculté de Technologie, Université Ferhat Abbas, Sétif-1, Algérie.

<sup>d</sup>. Département de Chimie, Faculté des Sciences de la Matière, Université de Batna-1, Algérie

<sup>e</sup>. Université de Lyon, Université Claude Bernard Lyon 1, Institut des Sciences Analytiques, UMR CNRS 5280, 69622 Villeurbanne Cedex, France

## Table of contents

|                                                                                                                                                                                                                                                                                                                                                                                                                                                                                                                                                                                                                                            |     |
|--------------------------------------------------------------------------------------------------------------------------------------------------------------------------------------------------------------------------------------------------------------------------------------------------------------------------------------------------------------------------------------------------------------------------------------------------------------------------------------------------------------------------------------------------------------------------------------------------------------------------------------------|-----|
| <b>Table S1.</b> Delocalization Indices ( $\delta(M, A)$ where $A= N$ or $Al$ and $M$ : from $Sc$ to $Zn$ ) for $M@b_{64}Al_{12}N_{12}$ and $M@b_{66}Al_{12}N_{12}$                                                                                                                                                                                                                                                                                                                                                                                                                                                                        | S3  |
| <b>Table S2a.</b> Excitation energy ( $E_{0 \rightarrow n}$ , eV) and wavelength ( $\lambda_{0 \rightarrow n}$ , nm), oscillator strengths ( $f_{0 \rightarrow n}$ , dimensionless), Integral of hole and electron, transition dipole moment ( $\Delta\mu_{0 \rightarrow n}$ , A.u.), $S_m$ index, $S_r(r)$ overlap, charge transfer distance (D index, Å), RMSD of hole and electron (Å), H and t indexes (Å), the hole delocalization index (HDI) and electron delocalization index (EDI) associated to the $S_0 \rightarrow S_n$ transition, as calculated at the cam-b3lyp/6-311+g(d) of the studied compounds $M@b_{64}Al_{12}N_{12}$ | S4  |
| <b>Table S2b.</b> Excitation energy ( $E_{0 \rightarrow n}$ , eV) and wavelength ( $\lambda_{0 \rightarrow n}$ , nm), oscillator strengths ( $f_{0 \rightarrow n}$ , dimensionless), Integral of hole and electron, transition dipole moment ( $\Delta\mu_{0 \rightarrow n}$ , A.u.), $S_m$ index, $S_r(r)$ overlap, charge transfer distance (D index, Å), RMSD of hole and electron (Å), H and t indexes (Å), the hole delocalization index (HDI) and electron delocalization index (EDI) associated to the $S_0 \rightarrow S_n$ transition, as calculated at the cam-b3lyp/6-311+g(d) of the studied compounds $M@b_{66}Al_{12}N_{12}$ | S6  |
| <b>Table S3.</b> Static and dynamic of $\beta_J = 1$ and $\beta_J = 3$ of $M@b_{64/66}Al_{12}N_{12}$ ( $M= Sc$ to $Zn$ )                                                                                                                                                                                                                                                                                                                                                                                                                                                                                                                   | S9  |
| <b>Table S4.</b> The frequency dispersion factor ( $FDF^\lambda$ ) between static and dynamic HRS hyperpolarizability at a specific wavelength ( $\lambda=1064, 1341$ and $1906$ nm)                                                                                                                                                                                                                                                                                                                                                                                                                                                       | S10 |
| <b>Table S5.</b> Static and dynamic second hyperpolarizability (au) for $Al_{12}N_{12}$                                                                                                                                                                                                                                                                                                                                                                                                                                                                                                                                                    | S10 |
| <b>Table S6.</b> Static and dynamic first hyperpolarizability (au) and depolarization ratio (DR) for $M@b_{64/66}Al_{12}N_{12}$ ( $M= Sc- Zn$ ) calculated by the sum-over-states method                                                                                                                                                                                                                                                                                                                                                                                                                                                   | S11 |
| <b>Scheme S1.</b> Optimized geometry of the title compound                                                                                                                                                                                                                                                                                                                                                                                                                                                                                                                                                                                 | S12 |
| <b>Figure S1.</b> Molecular topology of $M@b_{64/66}Al_{12}N_{12}$ ( $M= Sc- Zn$ )                                                                                                                                                                                                                                                                                                                                                                                                                                                                                                                                                         | S13 |
| <b>Figure S2.</b> Calculated UV – vis absorption spectra of $M@b_{64/66}Al_{12}N_{12}$ ( $M$ from $Sr$ to $Zn$ )                                                                                                                                                                                                                                                                                                                                                                                                                                                                                                                           | S18 |
| <b>Figure S3.</b> Molecular orbitals (MO) and electron density difference maps (EDDM) for the crucial excited states of $M@b_{64}Al_{12}N_{12}$ and $M@b_{66}Al_{12}N_{12}$                                                                                                                                                                                                                                                                                                                                                                                                                                                                | S31 |
| <b>Figure S4.</b> Variation of first hyperpolarizability ( $\beta_{HRS}^\infty$ ) and second hyperpolarizability ( $\gamma(0;0,0,0)$ ) of $M@b_{64}Al_{12}N_{12}$ (red) and $M@b_{66}Al_{12}N_{12}$ (blue) where $M= Sc-Zn$                                                                                                                                                                                                                                                                                                                                                                                                                | S32 |
| <b>Figure S5.</b> Relationship between $I_{\Psi V}^{2w}$ and polarization angle $\Psi$ of $M@b_{64/66}Al_{12}N_{12}$                                                                                                                                                                                                                                                                                                                                                                                                                                                                                                                       | S33 |
| <b>Figure S6.</b> Plot of $\beta_{HRS}^\lambda$ as a function of $\beta_{SHG}^\lambda$ for $M@b_{64/66}Al_{12}N_{12}$ , where $M= Sc$ to $Zn$ ), 1906, 1341, and 1064 nm                                                                                                                                                                                                                                                                                                                                                                                                                                                                   | S34 |

Table S1. Delocalization Indices ( $\delta(M, A)$  where  $A = N$  or  $Al$  and  $M$ : from  $Sc$  to  $Zn$ ) for  $M@b_{64}Al_{12}N_{12}$  and  $M@b_{66}Al_{12}N_{12}$

| $M@b_{64}Al_{12}N_{12}$ | Sc     | Ti     | V      | Cr     | Mn     | Fe     | Co     | Ni     | Cu     | Zn     | $M@b_{66}Al_{12}N_{12}$ | Sc     | Ti     | V      | Cr     | Mn     | Fe     | Co     | Ni     | Cu     | Zn     |
|-------------------------|--------|--------|--------|--------|--------|--------|--------|--------|--------|--------|-------------------------|--------|--------|--------|--------|--------|--------|--------|--------|--------|--------|
| <b>1(AL)</b>            | 0.93   | 0.94   | 0.95   | 0.81   | 0.72   | 0.81   | 0.81   | 0.82   | 0.77   | 0.65   | <b>1(AL)</b>            | 0.01   | 0.01   | 0.01   | 0.01   | 0.009  | 0.009  | 0.009  | 0.008  | 0.009  | 0.007  |
| <b>2(AL)</b>            | 0.27   | 0.27   | 0.23   | 0.18   | 0.15   | 0.16   | 0.15   | 0.14   | 0.15   | 0.11   | <b>2(AL)</b>            | 0.005  | 0.004  | 0.003  | 0.003  | 0.003  | 0.002  | 0.002  | 0.002  | 0.002  | 0.002  |
| <b>3(N)</b>             | 1.74   | 1.74   | 1.65   | 1.29   | 1.14   | 1.17   | 1.12   | 1.08   | 1.20   | 0.80   | <b>3(N)</b>             | 0.002  | 0.002  | 0.001  | 0.001  | 0.001  | 0.001  | 0.001  | 0.001  | 0.001  | 0.001  |
| <b>4(N)</b>             | 0.11   | 0.11   | 0.09   | 0.06   | 0.06   | 0.06   | 0.05   | 0.05   | 0.06   | 0.05   | <b>4(N)</b>             | 0.01   | 0.01   | 0.01   | 0.009  | 0.008  | 0.008  | 0.007  | 0.007  | 0.008  | 0.005  |
| <b>5(AL)</b>            | 0.01   | 0.01   | 0.01   | 0.01   | 0.009  | 0.009  | 0.01   | 0.009  | 0.01   | 0.007  | <b>5(AL)</b>            | 0.02   | 0.01   | 0.01   | 0.01   | 0.01   | 0.01   | 0.01   | 0.01   | 0.01   | 0.01   |
| <b>6(AL)</b>            | 0.01   | 0.01   | 0.01   | 0.008  | 0.008  | 0.009  | 0.008  | 0.008  | 0.009  | 0.007  | <b>6(AL)</b>            | 0.90   | 0.87   | 0.86   | 0.84   | 0.74   | 0.85   | 0.83   | 0.83   | 0.79   | 0.66   |
| <b>7(N)</b>             | 0.06   | 0.06   | 0.06   | 0.04   | 0.04   | 0.04   | 0.04   | 0.04   | 0.04   | 0.04   | <b>7(N)</b>             | 0.04   | 0.04   | 0.04   | 0.03   | 0.03   | 0.03   | 0.03   | 0.03   | 0.03   | 0.03   |
| <b>8(N)</b>             | 0.003  | 0.003  | 0.003  | 0.002  | 0.002  | 0.003  | 0.002  | 0.002  | 0.002  | 0.002  | <b>8(N)</b>             | 0.04   | 0.04   | 0.04   | 0.03   | 0.03   | 0.03   | 0.03   | 0.03   | 0.03   | 0.03   |
| <b>9(AL)</b>            | 0.0008 | 0.0007 | 0.0006 | 0.0005 | 0.0006 | 0.0006 | 0.0005 | 0.0004 | 0.0004 | 0.0004 | <b>9(AL)</b>            | 0.005  | 0.004  | 0.003  | 0.003  | 0.003  | 0.002  | 0.002  | 0.002  | 0.002  | 0.002  |
| <b>10(AL)</b>           | 0.002  | 0.002  | 0.002  | 0.002  | 0.002  | 0.002  | 0.001  | 0.001  | 0.001  | 0.001  | <b>10(AL)</b>           | 0.01   | 0.01   | 0.01   | 0.01   | 0.009  | 0.009  | 0.009  | 0.008  | 0.009  | 0.007  |
| <b>11(N)</b>            | 0.001  | 0.001  | 0.001  | 0.0007 | 0.0007 | 0.0006 | 0.0005 | 0.0005 | 0.0005 | 0.0004 | <b>11(N)</b>            | 0.002  | 0.002  | 0.001  | 0.001  | 0.001  | 0.001  | 0.001  | 0.001  | 0.001  | 0.001  |
| <b>12(N)</b>            | 0.0002 | 0.0002 | 0.0002 | 0.0002 | 0.0002 | 0.0002 | 0.0001 | 0.0001 | 0.0001 | 0.0001 | <b>12(N)</b>            | 0.01   | 0.01   | 0.01   | 0.009  | 0.008  | 0.008  | 0.007  | 0.007  | 0.008  | 0.005  |
| <b>13(AL)</b>           | 0.005  | 0.004  | 0.004  | 0.003  | 0.004  | 0.004  | 0.003  | 0.003  | 0.004  | 0.003  | <b>13(AL)</b>           | 0.001  | 0.0009 | 0.0007 | 0.0006 | 0.0006 | 0.0005 | 0.0005 | 0.0004 | 0.0004 | 0.0003 |
| <b>14(AL)</b>           | 0.004  | 0.003  | 0.003  | 0.003  | 0.003  | 0.003  | 0.003  | 0.003  | 0.003  | 0.003  | <b>14(AL)</b>           | 0.01   | 0.009  | 0.008  | 0.007  | 0.008  | 0.008  | 0.007  | 0.007  | 0.007  | 0.007  |
| <b>15(N)</b>            | 0.0008 | 0.0008 | 0.0006 | 0.0006 | 0.0006 | 0.0005 | 0.0005 | 0.0004 | 0.0004 | 0.0003 | <b>15(N)</b>            | 0.001  | 0.0009 | 0.0007 | 0.0006 | 0.0006 | 0.0006 | 0.0005 | 0.0005 | 0.0005 | 0.0004 |
| <b>16(N)</b>            | 0.01   | 0.01   | 0.011  | 0.009  | 0.01   | 0.01   | 0.009  | 0.008  | 0.009  | 0.008  | <b>16(N)</b>            | 0.001  | 0.0009 | 0.0007 | 0.0006 | 0.0006 | 0.0006 | 0.0005 | 0.0005 | 0.0005 | 0.0004 |
| <b>17(AL)</b>           | 0.02   | 0.02   | 0.02   | 0.01   | 0.01   | 0.01   | 0.01   | 0.01   | 0.01   | 0.01   | <b>17(AL)</b>           | 0.23   | 0.21   | 0.19   | 0.16   | 0.01   | 0.14   | 0.13   | 0.12   | 0.13   | 0.08   |
| <b>18(AL)</b>           | 0.001  | 0.001  | 0.001  | 0.001  | 0.001  | 0.001  | 0.001  | 0.001  | 0.001  | 0.001  | <b>18(AL)</b>           | 0.24   | 0.22   | 0.19   | 0.17   | 0.14   | 0.14   | 0.13   | 0.12   | 0.13   | 0.08   |
| <b>19(N)</b>            | 0.001  | 0.001  | 0.001  | 0.001  | 0.001  | 0.001  | 0.001  | 0.001  | 0.001  | 0.001  | <b>19(N)</b>            | 1.58   | 1.46   | 1.41   | 1.28   | 1.14   | 1.18   | 1.12   | 1.10   | 1.19   | 0.80   |
| <b>20(N)</b>            | 0.002  | 0.002  | 0.002  | 0.002  | 0.002  | 0.002  | 0.001  | 0.001  | 0.001  | 0.001  | <b>20(N)</b>            | 0.03   | 0.02   | 0.02   | 0.02   | 0.02   | 0.02   | 0.01   | 0.01   | 0.02   | 0.01   |
| <b>21(AL)</b>           | 0.29   | 0.28   | 0.26   | 0.20   | 0.17   | 0.16   | 0.16   | 0.14   | 0.16   | 0.11   | <b>21(AL)</b>           | 0.002  | 0.002  | 0.001  | 0.001  | 0.001  | 0.001  | 0.001  | 0.001  | 0.001  | 0.001  |
| <b>22(AL)</b>           | 0.008  | 0.008  | 0.007  | 0.005  | 0.005  | 0.005  | 0.004  | 0.004  | 0.004  | 0.004  | <b>22(AL)</b>           | 0.002  | 0.002  | 0.001  | 0.001  | 0.001  | 0.001  | 0.001  | 0.001  | 0.001  | 0.001  |
| <b>23(N)</b>            | 0.031  | 0.02   | 0.02   | 0.01   | 0.01   | 0.009  | 0.009  | 0.008  | 0.01   | 0.005  | <b>23(N)</b>            | 0.003  | 0.003  | 0.003  | 0.002  | 0.002  | 0.002  | 0.002  | 0.002  | 0.002  | 0.002  |
| <b>24(N)</b>            | 0.01   | 0.01   | 0.01   | 0.009  | 0.009  | 0.009  | 0.008  | 0.008  | 0.008  | 0.008  | <b>24(N)</b>            | 0.0003 | 0.0003 | 0.0002 | 0.0002 | 0.0002 | 0.0002 | 0.0002 | 0.0001 | 0.0001 | 0.0001 |

|              |      |      |      |      |      |      |      |      |      |      |              |      |      |      |      |      |      |      |      |      |      |
|--------------|------|------|------|------|------|------|------|------|------|------|--------------|------|------|------|------|------|------|------|------|------|------|
| <b>25(M)</b> | 3.55 | 3.55 | 3.40 | 2.69 | 2.39 | 2.52 | 2.45 | 2.38 | 2.50 | 1.85 | <b>25(M)</b> | 3.21 | 3.01 | 2.86 | 2.65 | 2.34 | 2.50 | 2.39 | 2.35 | 2.42 | 1.79 |
|--------------|------|------|------|------|------|------|------|------|------|------|--------------|------|------|------|------|------|------|------|------|------|------|

**Table S2a.** Excitation energy ( $E_{0 \rightarrow n}$ , eV) and wavelength ( $\lambda_{0 \rightarrow n}$ , nm), oscillator strengths ( $f_{0 \rightarrow n}$ , dimensionless), Integral of hole and electron, transition dipole moment ( $\Delta\mu_{0 \rightarrow n}$ , a.u),  $S_m$  index,  $S_r(r)$  overlap, charge transfer distance (D index, Å), RMSD of hole and electron (Å), H and t indexes (Å), the hole delocalization index (HDI) and electron delocalization index (EDI) associated to the  $S_0 \rightarrow S_n$  transition, as calculated at the cam-b3lyp/6-311+g(d) of the studied compounds **M@b<sub>64</sub>Al<sub>12</sub>N<sub>12</sub>**

|                                                       | $S_{0 \rightarrow n}$  | $\Delta E_{0 \rightarrow n}$ | $\Delta \lambda_{0 \rightarrow n}$ | $f_{0 \rightarrow n}$ | Integral of |          | $\Delta\mu_{0 \rightarrow n}$ | Sm    | Sr    | D index | RMSD hole | RMSD electron | H index | t index | HDI   | EDI   |
|-------------------------------------------------------|------------------------|------------------------------|------------------------------------|-----------------------|-------------|----------|-------------------------------|-------|-------|---------|-----------|---------------|---------|---------|-------|-------|
|                                                       |                        |                              |                                    |                       | hole        | electron |                               |       |       |         |           |               |         |         |       |       |
| <b>Sc@b<sub>64</sub>Al<sub>12</sub>N<sub>12</sub></b> | $S_{0 \rightarrow 5}$  | 1.617                        | 766.853                            | 0.009                 | 0.999       | 0.988    | 2.037                         | 0.499 | 0.795 | 1.085   | 2.210     | 2.607         | 2.408   | -0.434  |       |       |
|                                                       | $S_{0 \rightarrow 11}$ | 2.478                        | 500.262                            | 0.01                  | 0.997       | 0.986    | 3.399                         | 0.398 | 0.690 | 1.813   | 2.196     | 3.711         | 2.953   | -0.095  | 8.77  | 4.39  |
|                                                       | $S_{0 \rightarrow 13}$ | 2.676                        | 463.235                            | 0.144                 | 0.999       | 0.964    | 2.201                         | 0.278 | 0.578 | 1.187   | 2.368     | 3.284         | 2.826   | -0.443  | 6.94  | 7.12  |
|                                                       | $S_{0 \rightarrow 15}$ | 2.925                        | 423.836                            | 0.121                 | 0.999       | 0.986    | 1.952                         | 0.377 | 0.667 | 1.04    | 2.379     | 2.456         | 2.418   | -0.534  | 6.87  | 10.08 |
| <b>Ti@b<sub>64</sub>Al<sub>12</sub>N<sub>12</sub></b> | $S_{0 \rightarrow 5}$  | 1.245                        | 996.102                            | 0.005                 | 0.999       | 0.986    | 1.177                         | 0.305 | 0.597 | 0.628   | 1.481     | 2.030         | 1.755   | -0.455  | 20.22 | 13.05 |
|                                                       | $S_{0 \rightarrow 15}$ | 2.886                        | 429.638                            | 0.022                 | 0.998       | 0.987    | 4.024                         | 0.282 | 0.589 | 2.144   | 2.115     | 3.814         | 2.964   | 0.237   | 11.54 | 3.73  |
|                                                       | $S_{0 \rightarrow 18}$ | 3.151                        | 393.528                            | 0.126                 | 0.999       | 0.988    | 1.178                         | 0.425 | 0.732 | 0.628   | 2.163     | 2.597         | 2.38    | -0.796  | 10.72 | 8.07  |
|                                                       | $S_{0 \rightarrow 16}$ | 2.895                        | 428.302                            | 0.055                 | 0.999       | 0.983    | 1.441                         | 0.366 | 0.662 | 1.044   | 2.252     | 3.693         | 2.972   | -0.749  | 7.91  | 4.34  |
| <b>V@b<sub>64</sub>Al<sub>12</sub>N<sub>12</sub></b>  | $S_{0 \rightarrow 5}$  | 1.508                        | 822.454                            | 0.001                 | 0.999       | 0.993    | 0.831                         | 0.292 | 0.596 | 0.442   | 1.327     | 1.984         | 1.655   | -0.588  | 25.90 | 15.88 |
|                                                       | $S_{0 \rightarrow 14}$ | 2.985                        | 415.346                            | 0.057                 | 0.999       | 0.984    | 2.59                          | 0.286 | 0.579 | 1.381   | 2.302     | 3.913         | 3.107   | -0.602  | 7.84  | 3.76  |
|                                                       | $S_{0 \rightarrow 15}$ | 3.041                        | 407.751                            | 0.116                 | 0.999       | 0.979    | 1.675                         | 0.453 | 0.757 | 0.896   | 2.250     | 2.742         | 2.496   | -0.773  | 8.61  | 7.87  |
|                                                       | $S_{0 \rightarrow 17}$ | 3.358                        | 369.211                            | 0.024                 | 1.000       | 0.987    | 2.82                          | 0.329 | 0.628 | 1.502   | 2.207     | 3.692         | 2.949   | -0.329  | 12.52 | 4.12  |
| <b>Cr@b<sub>64</sub>Al<sub>12</sub>N<sub>12</sub></b> | $S_{0 \rightarrow 1}$  | 1.352                        | 917.319                            | 0.001                 | 0.999       | 0.990    | 1.048                         | 0.321 | 0.602 | 0.558   | 1.460     | 2.115         | 1.788   | -0.736  | 29.66 | 14.99 |
|                                                       | $S_{0 \rightarrow 7}$  | 2.558                        | 484.695                            | 0.088                 | 0.998       | 0.980    | 2.267                         | 0.285 | 0.590 | 1.213   | 2.305     | 3.931         | 3.118   | -0.664  | 7.31  | 3.7   |
|                                                       | $S_{0 \rightarrow 11}$ | 3.08                         | 402.588                            | 0.110                 | 0.999       | 0.986    | 0.629                         | 0.353 | 0.669 | 0.335   | 1.814     | 2.977         | 2.396   | -1.147  | 19.82 | 5.23  |

|                                                       |                        |       |         |        |       |       |       |       |       |       |       |       |       |        |       |       |
|-------------------------------------------------------|------------------------|-------|---------|--------|-------|-------|-------|-------|-------|-------|-------|-------|-------|--------|-------|-------|
|                                                       | $S_{0 \rightarrow 16}$ | 3.508 | 353.465 | 0.054  | 0.999 | 0.981 | 1.512 | 0.456 | 0.759 | 0.808 | 2.349 | 3.547 | 2.948 | -0.935 | 9.9   | 7.96  |
| <b>Mn@b<sub>64</sub>Al<sub>12</sub>N</b>              | $S_{0 \rightarrow 1}$  | 1.458 | 850.610 | 0.01   | 0.997 | 0.993 | 0.46  | 0.603 | 0.86  | 0.245 | 2.223 | 2.487 | 2.355 | -1.195 | 6.73  | 6.34  |
|                                                       | $S_{0 \rightarrow 6}$  | 2.563 | 483.730 | 0.043  | 0.996 | 0.993 | 3.736 | 0.322 | 0.631 | 1.987 | 2.319 | 3.543 | 2.931 | 0.020  | 6.64  | 8.82  |
|                                                       | $S_{0 \rightarrow 8}$  | 2.928 | 423.402 | 0.073  | 0.999 | 0.987 | 1.525 | 0.41  | 0.715 | 0.813 | 2.301 | 3.456 | 2.878 | -1.067 | 8.85  | 14.91 |
|                                                       | $S_{0 \rightarrow 9}$  | 2.98  | 416.112 | 0.140  | 0.999 | 0.98  | 2.254 | 0.414 | 0.733 | 1.205 | 2.289 | 2.795 | 2.542 | -0.443 | 8.8   | 8.75  |
| <b>Fe@b<sub>64</sub>Al<sub>12</sub>N<sub>12</sub></b> | $S_{0 \rightarrow 4}$  | 1.301 | 952.704 | 0.023  | 0.997 | 0.993 | 0.309 | 0.603 | 0.872 | 0.164 | 2.126 | 2.286 | 2.206 | -1.171 | 9.6   | 11.55 |
|                                                       | $S_{0 \rightarrow 9}$  | 2.42  | 512.334 | 0.057  | 0.996 | 0.991 | 5.929 | 0.187 | 0.486 | 3.156 | 2.348 | 3.891 | 3.12  | 1.111  | 7.88  | 3.11  |
|                                                       | $S_{0 \rightarrow 13}$ | 3.17  | 391.119 | 0.085  | 0.999 | 0.980 | 1.568 | 0.421 | 0.727 | 0.839 | 2.104 | 2.913 | 2.508 | -0.842 | 14.84 | 7.7   |
|                                                       | $S_{0 \rightarrow 15}$ | 3.538 | 350.467 | 0.022  | 0.999 | 0.989 | 4.551 | 0.2   | 0.465 | 2.421 | 2.56  | 3.944 | 3.252 | 0.279  | 13.44 | 2.92  |
| <b>Co@b<sub>64</sub>Al<sub>12</sub>N<sub>1</sub></b>  | $S_{0 \rightarrow 8}$  | 1.728 | 717.713 | <0.001 | 1.000 | 0.996 | 0.620 | 0.293 | 0.581 | 0.329 | 1.565 | 1.394 | 1.479 | -0.633 | 27.88 | 36.89 |
|                                                       | $S_{0 \rightarrow 9}$  | 1.848 | 671.059 | 0.072  | 0.997 | 0.988 | 0.672 | 0.512 | 0.805 | 0.358 | 2.179 | 2.573 | 2.376 | -1.001 | 8.77  | 6.24  |
|                                                       | $S_{0 \rightarrow 11}$ | 2.545 | 487.113 | 0.064  | 0.997 | 0.991 | 6.270 | 0.158 | 0.435 | 3.336 | 2.342 | 3.901 | 3.121 | 1.325  | 7.55  | 2.98  |
|                                                       | $S_{0 \rightarrow 13}$ | 3.062 | 404.862 | 0.008  | 1.001 | 0.987 | 0.124 | 0.18  | 0.45  | 0.066 | 1.244 | 2.563 | 1.903 | -1.186 | 38.63 | 6.19  |
| <b>Ni@b<sub>64</sub>Al<sub>12</sub>N<sub>12</sub></b> | $S_{0 \rightarrow 5}$  | 1.833 | 676.220 | 0.037  | 0.998 | 0.989 | 0.306 | 0.594 | 0.845 | 0.163 | 1.963 | 2.461 | 2.212 | -1.305 | 18.65 | 8.03  |
|                                                       | $S_{0 \rightarrow 7}$  | 2.582 | 480.152 | 0.055  | 0.997 | 0.991 | 5.838 | 0.175 | 0.469 | 3.107 | 2.35  | 3.884 | 3.117 | 1.098  | 8.29  | 2.99  |
|                                                       | $S_{0 \rightarrow 13}$ | 3.657 | 339.007 | 0.002  | 0.999 | 0.987 | 1.209 | 0.225 | 0.519 | 0.644 | 3.035 | 4.007 | 3.521 | -1.244 | 9.55  | 4.70  |
|                                                       | $S_{0 \rightarrow 14}$ | 3.755 | 330.221 | <0.001 | 0.999 | 0.986 | 0.764 | 0.271 | 0.562 | 0.407 | 3.499 | 4.082 | 3.79  | -1.782 | 7.33  | 2.62  |
| <b>Cu@b<sub>64</sub>Al<sub>12</sub>N<sub>1</sub></b>  | $S_{0 \rightarrow 1}$  | 2.095 | 591.955 | 0.076  | 0.998 | 0.984 | 1.25  | 0.445 | 0.726 | 0.667 | 2.175 | 2.54  | 2.357 | -0.782 | 11.00 | 5.77  |
|                                                       | $S_{0 \rightarrow 2}$  | 2.647 | 468.362 | 0.057  | 0.998 | 0.99  | 5.548 | 0.194 | 0.489 | 2.952 | 2.328 | 3.930 | 3.129 | 0.927  | 9.12  | 2.89  |
|                                                       | $S_{0 \rightarrow 9}$  | 3.61  | 343.448 | 0.001  | 0.999 | 0.988 | 0.817 | 0.277 | 0.586 | 0.435 | 3.072 | 3.916 | 3.494 | -1.369 | 10.80 | 4.56  |
|                                                       | $S_{0 \rightarrow 11}$ | 3.745 | 331.041 | <0.001 | 0.999 | 0.988 | 0.362 | 0.209 | 0.501 | 0.193 | 3.264 | 4.015 | 3.639 | -1.765 | 8.63  | 2.71  |
| <b>Zn@b<sub>64</sub>Al<sub>12</sub>N<sub>12</sub></b> | $S_{0 \rightarrow 3}$  | 2.994 | 414.111 | 0.215  | 0.999 | 0.990 | 0.412 | 0.409 | 0.699 | 0.219 | 2.286 | 2.649 | 2.468 | -1.546 | 9.10  | 6.09  |
|                                                       | $S_{0 \rightarrow 5}$  | 3.332 | 372.070 | 0.09   | 0.999 | 0.992 | 5.752 | 0.153 | 0.413 | 3.057 | 2.425 | 3.887 | 3.156 | 1.006  | 8.24  | 3.03  |
|                                                       | $S_{0 \rightarrow 8}$  | 3.863 | 320.922 | 0.085  | 0.999 | 0.993 | 1.449 | 0.329 | 0.598 | 0.770 | 2.496 | 3.28  | 2.888 | -0.699 | 8.04  | 3.66  |
|                                                       | $S_{0 \rightarrow 11}$ | 3.977 | 311.723 | 0.002  | 0.999 | 0.987 | 0.671 | 0.233 | 0.514 | 0.357 | 3.289 | 4.085 | 3.687 | -1.748 | 8.36  | 2.49  |

**Table S2b.** Excitation energy ( $E_{0 \rightarrow n}$ , eV) and wavelength ( $\lambda_{0 \rightarrow n}$ , nm), oscillator strengths ( $f_{0 \rightarrow n}$ , dimensionless), Integral of hole and electron, transition dipole moment ( $\Delta\mu_{0 \rightarrow n}$ , A.u.),  $S_m$  index,  $S_r(r)$  overlap, charge transfer distance (D index, Å), RMSD of hole and electron (Å), H and t indexes (Å), the hole delocalization index (HDI) and electron delocalization index (EDI) associated to the  $S_0 \rightarrow S_n$  transition, as calculated at the cam-b3lyp/6-311+g(d) of the studied compounds  $\mathbf{M@b_{66}Al_{12}N_{12}}$

|                                                       | $S_{0 \rightarrow n}$  | $E_{0 \rightarrow n}$ | $\lambda_{0 \rightarrow n}$ | $f_{0 \rightarrow n}$ | Integral of |          | $\Delta\mu_{0 \rightarrow n}$ | Sm    | Sr    | D index | RMSD hole | RMSD electron | H index | t index | HDI   | EDI   |
|-------------------------------------------------------|------------------------|-----------------------|-----------------------------|-----------------------|-------------|----------|-------------------------------|-------|-------|---------|-----------|---------------|---------|---------|-------|-------|
|                                                       |                        |                       |                             |                       | hole        | electron |                               |       |       |         |           |               |         |         |       |       |
| <b>Sc@b<sub>66</sub>Al<sub>12</sub>N<sub>12</sub></b> | $S_{0 \rightarrow 6}$  | 1.401                 | 885.227                     | 0.001                 | 0.997       | 0.996    | 0.982                         | 0.398 | 0.706 | 0.522   | 1.882     | 2.268         | 2.084   | -0.710  | 11.90 | 9.94  |
|                                                       | $S_{0 \rightarrow 10}$ | 2.095                 | 591.898                     | 0.013                 | 0.998       | 0.990    | 3.866                         | 0.387 | 0.702 | 2.058   | 2.012     | 3.617         | 2.814   | 0.238   | 10.98 | 4.55  |
|                                                       | $S_{0 \rightarrow 13}$ | 2.350                 | 527.618                     | 0.251                 | 0.998       | 0.957    | 1.888                         | 0.348 | 0.658 | 1.022   | 2.413     | 3.045         | 2.729   | -0.739  | 6.24  | 6.04  |
|                                                       | $S_{0 \rightarrow 24}$ | 3.482                 | 356.125                     | 0.121                 | 0.998       | 0.989    | 2.618                         | 0.354 | 0.641 | 1.394   | 2.413     | 3.224         | 2.818   | -0.141  | 6.14  | 4.78  |
| <b>Ti@b<sub>66</sub>Al<sub>12</sub>N<sub>12</sub></b> | $S_{0 \rightarrow 8}$  | 1.480                 | 837.905                     | <0.001                | 0.999       | 0.996    | 0.247                         | 0.521 | 0.802 | 0.131   | 1.927     | 2.277         | 2.102   | -1.166  | 11.43 | 9.98  |
|                                                       | $S_{0 \rightarrow 13}$ | 2.100                 | 590.264                     | 0.177                 | 0.998       | 0.975    | 1.590                         | 0.356 | 0.670 | 0.853   | 2.310     | 2.942         | 2.626   | -0.837  | 7.16  | 7.15  |
|                                                       | $S_{0 \rightarrow 15}$ | 2.330                 | 532.192                     | <0.001                | 0.998       | 0.991    | 3.371                         | 0.368 | 0.667 | 1.793   | 2.380     | 3.689         | 3.034   | -0.229  | 6.62  | 6.69  |
|                                                       | $S_{0 \rightarrow 16}$ | 2.392                 | 518.310                     | 0.01                  | 0.999       | 0.993    | 3.392                         | 0.343 | 0.640 | 1.802   | 1.684     | 3.427         | 2.556   | 0.187   | 15.77 | 4.92  |
| <b>V@b<sub>66</sub>Al<sub>12</sub>N<sub>12</sub></b>  | $S_{0 \rightarrow 7}$  | 1.443                 | 859.34                      | <0.001                | 0.999       | 0.990    | 0.966                         | 0.256 | 0.544 | 0.514   | 1.078     | 1.749         | 1.414   | -0.455  | 28.06 | 16.45 |
|                                                       | $S_{0 \rightarrow 8}$  | 1.830                 | 677.550                     | 0.003                 | 0.998       | 0.991    | 1.382                         | 0.570 | 0.847 | 0.735   | 2.157     | 2.488         | 2.322   | -0.691  | 8.06  | 7.41  |
|                                                       | $S_{0 \rightarrow 12}$ | 2.503                 | 495.325                     | 0.075                 | 0.999       | 0.991    | 3.033                         | 0.309 | 0.594 | 1.841   | 2.297     | 3.770         | 3.033   | -0.195  | 7.33  | 7.50  |
|                                                       | $S_{0 \rightarrow 16}$ | 2.834                 | 437.552                     | 0.059                 | 0.998       | 0.984    | 2.476                         | 0.340 | 0.652 | 1.321   | 2.139     | 3.361         | 2.750   | -0.308  | 8.60  | 9.12  |
| <b>Cr@b<sub>66</sub>Al<sub>12</sub>N<sub>12</sub></b> | $S_{0 \rightarrow 1}$  | 1.439                 | 861.664                     | <0.001                | 0.999       | 0.991    | 1.008                         | 0.318 | 0.601 | 0.536   | 1.383     | 2.022         | 1.702   | -0.723  | 30.24 | 15.24 |
|                                                       | $S_{0 \rightarrow 7}$  | 2.504                 | 495.127                     | 0.097                 | 0.999       | 0.981    | 2.636                         | 0.278 | 0.579 | 1.409   | 2.272     | 3.890         | 3.081   | -0.411  | 7.46  | 3.61  |
|                                                       | $S_{0 \rightarrow 11}$ | 3.072                 | 403.610                     | 0.006                 | 0.999       | 0.994    | 2.829                         | 0.422 | 0.737 | 1.502   | 2.203     | 2.816         | 2.510   | 0.118   | 8.69  | 7.10  |
|                                                       | $S_{0 \rightarrow 16}$ | 3.473                 | 356.976                     | 0.061                 | 0.999       | 0.987    | 4.548                         | 0.277 | 0.582 | 2.423   | 2.313     | 3.868         | 3.089   | 0.367   | 11.94 | 3.34  |
| <b>M</b>                                              | $S_{0 \rightarrow 1}$  | 1.466                 | 845.563                     | 0.011                 | 0.995       | 0.995    | 0.624                         | 0.594 | 0.858 | 0.332   | 2.195     | 2.478         | 2.336   | -1.199  | 6.72  | 6.23  |

|                                                       |                        |       |         |        |       |       |       |       |       |       |       |       |       |        |       |      |
|-------------------------------------------------------|------------------------|-------|---------|--------|-------|-------|-------|-------|-------|-------|-------|-------|-------|--------|-------|------|
| <b>n</b>                                              | $S_{0 \rightarrow 4}$  | 2.354 | 526.699 | 0.024  | 0.994 | 0.992 | 4.788 | 0.269 | 0.566 | 2.550 | 2.297 | 3.631 | 2.964 | 0.560  | 6.85  | 5.59 |
|                                                       | $S_{0 \rightarrow 8}$  | 2.924 | 424.054 | 0.118  | 0.998 | 0.990 | 1.901 | 0.469 | 0.771 | 1.011 | 2.230 | 2.874 | 2.552 | -0.542 | 9.51  | 8.10 |
|                                                       | $S_{0 \rightarrow 9}$  | 2.990 | 414.665 | 0.085  | 0.998 | 0.989 | 4.717 | 0.289 | 0.561 | 2.512 | 2.318 | 3.905 | 3.112 | 0.416  | 8.82  | 7.14 |
|                                                       | $S_{0 \rightarrow 13}$ | 2.990 | 414.665 | 0.085  | 0.998 | 0.989 | 4.717 | 0.289 | 0.561 | 2.512 | 2.318 | 3.905 | 3.112 | 0.416  | 8.82  | 7.14 |
| <b>Fe@b<sub>66</sub>Al<sub>12</sub>N<sub>12</sub></b> | $S_{0 \rightarrow 4}$  | 1.431 | 866.119 | 0.022  | 0.997 | 0.995 | 0.400 | 0.576 | 0.848 | 0.213 | 2.082 | 2.299 | 2.191 | -1.111 | 8.64  | 9.01 |
|                                                       | $S_{0 \rightarrow 9}$  | 2.416 | 513.182 | 0.05   | 0.996 | 0.991 | 6.208 | 0.157 | 0.439 | 3.305 | 2.304 | 3.761 | 3.032 | 1.354  | 7.60  | 3.24 |
|                                                       | $S_{0 \rightarrow 13}$ | 3.244 | 382.162 | 0.129  | 0.999 | 0.985 | 1.181 | 0.435 | 0.723 | 0.630 | 2.092 | 3.139 | 2.615 | -0.852 | 14.39 | 6.42 |
|                                                       | $S_{0 \rightarrow 14}$ | 3.143 | 356.555 | 0.037  | 0.999 | 0.989 | 5.005 | 0.194 | 0.445 | 2.663 | 2.387 | 3.899 | 3.143 | 0.608  | 13.28 | 2.97 |
| <b>Co@b<sub>66</sub>Al<sub>12</sub>N<sub>1</sub></b>  | $S_{0 \rightarrow 7}$  | 1.542 | 804.000 | 0.031  | 0.998 | 0.993 | 0.252 | 0.587 | 0.856 | 0.134 | 1.926 | 2.367 | 2.147 | -1.170 | 15.37 | 8.94 |
|                                                       | $S_{0 \rightarrow 9}$  | 2.428 | 510.604 | 0.049  | 0.997 | 0.991 | 6.040 | 0.158 | 0.438 | 3.214 | 2.307 | 3.770 | 3.039 | 1.260  | 8.13  | 3.28 |
|                                                       | $S_{0 \rightarrow 13}$ | 3.284 | 377.508 | 0.088  | 0.999 | 0.986 | 0.815 | 0.374 | 0.659 | 0.435 | 1.865 | 3.010 | 2.437 | -0.962 | 22.13 | 5.36 |
|                                                       | $S_{0 \rightarrow 18}$ | 3.769 | 328.968 | 0.022  | 1.000 | 0.988 | 2.971 | 0.226 | 0.506 | 1.582 | 3.510 | 4.075 | 3.792 | -1.001 | 11.58 | 2.62 |
| <b>Ni@b<sub>66</sub>Al<sub>12</sub>N<sub>12</sub></b> | $S_{0 \rightarrow 5}$  | 1.909 | 649.646 | 0.068  | 0.997 | 0.989 | 0.750 | 0.501 | 0.803 | 0.400 | 2.101 | 2.501 | 2.301 | -0.940 | 10.00 | 6.09 |
|                                                       | $S_{0 \rightarrow 7}$  | 2.479 | 500.221 | 0.056  | 0.997 | 0.991 | 5.983 | 0.161 | 0.444 | 3.184 | 2.301 | 3.818 | 3.060 | 1.221  | 8.35  | 3.12 |
|                                                       | $S_{0 \rightarrow 14}$ | 3.685 | 336.467 | <0.001 | 0.999 | 0.990 | 1.219 | 0.202 | 0.485 | 0.648 | 2.982 | 3.925 | 3.454 | -1.345 | 10.55 | 3.63 |
|                                                       | $S_{0 \rightarrow 16}$ | 3.843 | 322.642 | 0.001  | 0.999 | 0.987 | 1.024 | 0.240 | 0.523 | 0.546 | 2.848 | 3.857 | 3.353 | -1.413 | 10.75 | 2.88 |
| <b>Cu@b<sub>66</sub>Al<sub>12</sub>N<sub>1</sub></b>  | $S_{0 \rightarrow 1}$  | 1.993 | 622.195 | 0.077  | 0.997 | 0.987 | 1.293 | 0.437 | 0.711 | 0.689 | 2.120 | 2.476 | 2.298 | -0.701 | 11.12 | 5.97 |
|                                                       | $S_{0 \rightarrow 2}$  | 2.521 | 491.847 | 0.053  | 0.997 | 0.991 | 5.799 | 0.158 | 0.424 | 3.085 | 2.295 | 3.836 | 3.065 | 1.128  | 9.29  | 3.14 |
|                                                       | $S_{0 \rightarrow 9}$  | 3.609 | 343.525 | <0.001 | 0.999 | 0.991 | 1.435 | 0.235 | 0.533 | 0.763 | 2.800 | 3.800 | 3.300 | -1.040 | 11.07 | 4.60 |
|                                                       | $S_{0 \rightarrow 12}$ | 3.776 | 328.385 | <0.001 | 0.999 | 0.989 | 0.629 | 0.215 | 0.508 | 0.335 | 3.256 | 3.995 | 3.625 | -1.638 | 8.29  | 2.63 |
| <b>Zn@b<sub>66</sub>Al<sub>12</sub>N<sub>1</sub></b>  | $S_{0 \rightarrow 3}$  | 2.901 | 427.416 | 0.197  | 0.999 | 0.992 | 0.439 | 0.404 | 0.694 | 0.233 | 2.286 | 2.581 | 2.434 | -1.505 | 9.41  | 6.12 |
|                                                       | $S_{0 \rightarrow 5}$  | 3.198 | 387.695 | 0.076  | 0.999 | 0.993 | 5.527 | 0.137 | 0.386 | 2.936 | 2.448 | 3.769 | 3.108 | 0.940  | 8.66  | 3.25 |
|                                                       | $S_{0 \rightarrow 11}$ | 3.975 | 311.888 | 0.02   | 0.999 | 0.990 | 0.555 | 0.245 | 0.525 | 0.296 | 3.428 | 4.195 | 3.812 | -1.776 | 8.26  | 2.35 |
|                                                       | $S_{0 \rightarrow 15}$ | 4.076 | 304.190 | 0.002  | 0.999 | 0.990 | 1.240 | 0.229 | 0.506 | 0.660 | 2.704 | 3.807 | 3.255 | -1.252 | 11.14 | 2.93 |

**Table S3.** Static and dynamic of  $\beta_{J=1}$  and  $\beta_{J=3}$  of  $M@b_{64/66}Al_{12}N_{12}$  (M= Sc to Zn)

|                  | $M@b_{64}Al_{12}N_{12}$ | Sc        | Ti        | V        | Cr       | Mn       | Fe       | Co        | Ni        | Cu        | Zn       |
|------------------|-------------------------|-----------|-----------|----------|----------|----------|----------|-----------|-----------|-----------|----------|
| $\lambda=\infty$ | $\beta_{J=1}$           | 14082.173 | 5891.150  | 3560.841 | 4142.269 | 1292.168 | 1374.754 | 1640.612  | 1777.973  | 1948.246  | 860.349  |
|                  | $\beta_{J=3}$           | 5119.968  | 1993.380  | 1179.743 | 1696.278 | 1519.675 | 1589.217 | 1309.425  | 1253.303  | 1360.834  | 620.968  |
| $\lambda=1064$   | $\beta_{J=1}$           | /         | /         | 6318.396 | 7379.356 | 12029.27 | 22404.68 | /         | 7024.467  | 11448.645 | 1956.270 |
|                  | $\beta_{J=3}$           | 800942.12 | 23387.25  | 20807.15 | 3471.322 | 22583.75 | 61527.43 | 25976.228 | 13889.98  | 16006.481 | 2150.988 |
| $\lambda=1341$   | $\beta_{J=1}$           | /         | 36131.39  | 9285.109 | 25843.95 | 4731.52  | /        | 86633.456 | 29896.341 | 9180.305  | 1372.268 |
|                  | $\beta_{J=3}$           | 816418.85 | 32861.10  | 12613.71 | 42822.67 | 5067.94  | 8296.31  | 118686.56 | 48219.500 | 8795.594  | 1208.057 |
| $\lambda=1906$   | $\beta_{J=1}$           | 18301.438 | 428459.85 | 4600.096 | 6918.910 | 5148.929 | /        | 2721.066  | 2900.709  | 3226.935  | 1125.387 |



|                  | $\beta_{J=3}$                                        | 34813.893  | 794286.71 | 3096.453 | 2242.221  | 5137.823  | 32898.960 | 2344.314  | 2642.910  | 2523.836  | 848.388   |
|------------------|------------------------------------------------------|------------|-----------|----------|-----------|-----------|-----------|-----------|-----------|-----------|-----------|
|                  | <b>M@b<sub>66</sub>Al<sub>12</sub>N<sub>12</sub></b> | <b>Sc</b>  | <b>Ti</b> | <b>V</b> | <b>Cr</b> | <b>Mn</b> | <b>Fe</b> | <b>Co</b> | <b>Ni</b> | <b>Cu</b> | <b>Zn</b> |
| $\lambda=\infty$ | $\beta_{J=1}$                                        | 12125.018  | 9280.389  | 5533.168 | 4197.558  | 1319.535  | 1188.119  | 4197.558  | 1488.229  | 1979.818  | 842.727   |
|                  | $\beta_{J=3}$                                        | 4145.306   | 4093.373  | 2276.701 | 1631.493  | 1368.097  | 1219.031  | 1631.493  | 1004.836  | 1268.424  | 516.981   |
| $\lambda=1064$   | $\beta_{J=1}$                                        | 1137438.70 | 81721.71  | 38578.18 | 7862.451  | 91739.242 | 25656.773 | 7862.451  | 13567.942 | 12388.328 | 2010.291  |
|                  | $\beta_{J=3}$                                        | 4715675.00 | 131175.95 | 32515.08 | 8331.589  | 152580.42 | 55179.804 | 8331.589  | 24315.702 | 19872.785 | 2182.833  |
| $\lambda=1341$   | $\beta_{J=1}$                                        | 4841922.84 | 47146.105 | 15101.44 | 21294.39  | 3805.077  | 1193.521  | 21294.394 | 23943.400 | 15885.973 | 1350.866  |
|                  | $\beta_{J=3}$                                        | 3948308.13 | 143268.74 | 28285.74 | 44212.05  | 6309.325  | 7677.550  | 44212.058 | 33586.982 | 16323.787 | 1077.724  |
| $\lambda=1906$   | $\beta_{J=1}$                                        | /          | 8551.052  | 2817.618 | 6892.510  | 5221.953  | 83629.240 | 2496.547  | 2457.599  | 3547.729  | 1100.944  |
|                  | $\beta_{J=3}$                                        | 17685.454  | 4336.656  | 3333.323 | 3454.442  | 4956.441  | 65608.133 | 2993.989  | 2105.365  | 2713.623  | 718.640   |

**Table S4.** The frequency dispersion factor ( $FDF^\lambda$ ) between static and dynamic HRS hyperpolarizability at a specific wavelength ( $\lambda=1064, 1341$  and  $1906$  nm)

| $M@b_{64}Al_{12}N_{12}$ | Sc         | Ti         | V          | Cr         | Mn         | Fe         | Co         | Ni         | Cu         | Zn         |
|-------------------------|------------|------------|------------|------------|------------|------------|------------|------------|------------|------------|
| $FDF^{1064}$            | 34.6664845 | 2.50648812 | 4.12105122 | 1.80046299 | 11.6878049 | 26.7342996 | 7.10155856 | 5.86796377 | 7.24475428 | 2.53310594 |
| $FDF^{1341}$            | 27.1856166 | 6.96903773 | 3.41029855 | 8.8909197  | 3.54362276 | 2.73763412 | 62.8675877 | 22.2032457 | 5.05852634 | 1.66451311 |
| $FDF^{1906}$            | 2.01924192 | 111.662467 | 1.37965208 | 1.64926272 | 3.77133919 | 10.4290727 | 1.68769196 | 1.72485592 | 1.69229307 | 1.31889156 |
| $M@b_{66}Al_{12}N_{12}$ | Sc         | Ti         | V          | Cr         | Mn         | Fe         | Co         | Ni         | Cu         | Zn         |
| $FDF^{1064}$            | 264.789643 | 12.2723311 | 7.68900761 | 2.20928456 | 85.0416993 | 30.9573248 | 25.5779815 | 12.8545885 | 8.36765175 | 2.7158968  |
| $FDF^{1341}$            | 441.742669 | 10.8674289 | 4.1697784  | 8.29611044 | 3.52146153 | 3.60934547 | 3.23285776 | 19.978546  | 8.91788538 | 1.6781584  |
| $FDF^{1906}$            | 0.80945292 | 0.93275904 | 0.62191629 | 1.67478826 | 3.85503873 | 65.6862151 | 2.42172551 | 1.73170134 | 1.8480803  | 1.3183448  |

**Table S5.** Static and dynamic second hyperpolarizability (au) for  $Al_{12}N_{12}$ 

|                                       |                    |                        |
|---------------------------------------|--------------------|------------------------|
| $\gamma(0;0,0,0)$                     | $\lambda = \infty$ | $6.335988 \times 10^4$ |
| $\gamma(-2\omega; \omega, \omega, 0)$ | $\lambda=1064$     | $8.257221 \times 10^4$ |
|                                       | $\lambda=1341$     | $7.497657 \times 10^4$ |
|                                       | $\lambda=1906$     | $6.927832 \times 10^4$ |

**Table S6.** Static and dynamic first hyperpolarizability (au) and depolarization ratio (DR) for  $M@b_{64/66}Al_{12}N_{12}$  (M= Sc- Zn) calculated by the sum-over-states method

| $M@b_{64}Al_{12}N_{12}$ | $DR_{SOS}^{\lambda=\infty}$ | $\beta_{SOS}^{\lambda=\infty}$ | $DR_{SOS}^{\lambda=1064}$ | $\beta_{SOS}^{\lambda=1064}$ | $\beta_{HRS,SOS}^{\lambda=1064}$ | $DR_{SOS}^{\lambda=1341}$ | $\beta_{SOS}^{\lambda=1341}$ | $\beta_{HRS,SOS}^{\lambda=1341}$ | $DR_{SOS}^{\lambda=1906}$ | $\beta_{SOS}^{\lambda=1906}$ | $\beta_{HRS,SOS}^{\lambda=1906}$ |
|-------------------------|-----------------------------|--------------------------------|---------------------------|------------------------------|----------------------------------|---------------------------|------------------------------|----------------------------------|---------------------------|------------------------------|----------------------------------|
| <b>Sc</b>               | 7.95                        | 7169                           | 3.39                      | 579762.42                    | 254237.97                        | 3.77                      | 25158.28                     | 11935.39                         | 2.91                      | 25910.15                     | 11545.39                         |
| <b>Ti</b>               | 7.57                        | 2705                           | 1.26                      | 5615.41                      | 4934.89                          | 9.04                      | 8127.36                      | 6420.25                          | 2.23                      | 50405.91                     | 24799.03                         |
| <b>V</b>                | 7.08                        | 1677                           | 2.29                      | 32777.03                     | 17301.48                         | 5.24                      | 9602.01                      | 3848.64                          | 8.11                      | 6064.56                      | 2288.99                          |
| <b>Cr</b>               | 6.63                        | 2482                           | 2.51                      | 9460.03                      | 4564.17                          | 2.58                      | 136959.32                    | 57986.40                         | 5.26                      | 10129.52                     | 3998.01                          |
| <b>Mn</b>               | 6.00                        | 2225                           | 4.23                      | 44516.06                     | 17989.43                         | 7.06                      | 15525.84                     | 6215.46                          | 5.46                      | 15765.60                     | 6287.04                          |
| <b>Fe</b>               | 4.95                        | 1861                           | 2.53                      | 100581.62                    | 43999.02                         | 2.70                      | 13131.09                     | 5623.80                          | 8.46                      | 357206.52                    | 296872.55                        |
| <b>Co</b>               | 5.07                        | 1049                           | 4.21                      | 38457.14                     | 15169.58                         | 1.70                      | 521762.19                    | 244368.38                        | 4.77                      | 4471.14                      | 1932.44                          |
| <b>Ni</b>               | 4.52                        | 921                            | 3.00                      | 25495.52                     | 10581.42                         | 1.85                      | 65945.66                     | 29236.42                         | 4.51                      | 3325.50                      | 1440.67                          |
| <b>Cu</b>               | 4.36                        | 772                            | 3.00                      | 25131.65                     | 10283.45                         | 3.60E                     | 9422.90                      | 4051.41                          | 4.21                      | 3003.85                      | 1305.23                          |
| <b>Zn</b>               | 3.32                        | 696                            | 3.17                      | 3858.29                      | 1792.65                          | 3.32                      | 2480.44                      | 1165.14                          | 3.34                      | 1826.75                      | 873.24                           |

| <b>M@b<sub>66</sub>Al<sub>12</sub>N<sub>12</sub></b> | $DR_{SOS}^{\lambda=\infty}$ | $\beta_{SOS}^{\lambda=\infty}$ | $DR_{SOS}^{\lambda=1064}$ | $\beta_{SOS}^{\lambda=1064}$ | $\beta_{HRS,SOS}^{\lambda=1064}$ | $DR_{SOS}^{\lambda=1341}$ | $\beta_{SOS}^{\lambda=1341}$ | $\beta_{HRS,SOS}^{\lambda=1341}$ | $DR_{SOS}^{\lambda=1906}$ | $\beta_{SOS}^{\lambda=1906}$ | $\beta_{HRS,SOS}^{\lambda=1906}$ |
|------------------------------------------------------|-----------------------------|--------------------------------|---------------------------|------------------------------|----------------------------------|---------------------------|------------------------------|----------------------------------|---------------------------|------------------------------|----------------------------------|
| <b>Sc</b>                                            | 7.87                        | 6899                           | 1.99                      | 895675.94                    | 429355.59                        | 1.95                      | 100867.76                    | 55537.23                         | 2.56                      | 13434.65                     | 6274.06                          |
| <b>Ti</b>                                            | 7.70                        | 5076                           | 3.48                      | 1249970.54                   | 534462.42                        | 4.39                      | 143939.35                    | 56509.46                         | 6.91                      | 21802.09                     | 8663.13                          |
| <b>V</b>                                             | 7.46                        | 2861                           | 5.42                      | 57731.03                     | 24521.52                         | 0.381                     | 16862.81                     | 20891.26                         | 6.06                      | 8546.79                      | 3261.79                          |
| <b>Cr</b>                                            | 7.21                        | 2484                           | 1.59                      | 12078.97                     | 6555.81                          | 2.25                      | 72657.45                     | 31325.23                         | 5.80                      | 10999.14                     | 4227.26                          |
| <b>Mn</b>                                            | 6.14                        | 2300                           | 3.16                      | 223110.52                    | 93353.11                         | 5.71                      | 15095.19                     | 6004.87                          | 5.61                      | 16605.87                     | 6611.32                          |
| <b>Fe</b>                                            | 5.47                        | 1853                           | 2.70                      | 83657.01                     | 35652.31                         | 2.90                      | 12622.29                     | 5415.79                          | 5.80                      | 10788.63                     | 4505.63                          |
| <b>Co</b>                                            | 5.11                        | 1398                           | 2.92                      | 68371.19                     | 28797.71                         | 1.42                      | 8395.61                      | 3905.82                          | 5.42                      | 6431.38                      | 2763.05                          |
| <b>Ni</b>                                            | 4.24                        | 852                            | 2.96                      | 42823.59                     | 17857.47                         | 1.91                      | 21322.15                     | 10293.98                         | 4.54                      | 3452.04                      | 1520.84                          |
| <b>Cu</b>                                            | 4.20                        | 672                            | 2.86                      | 33042.36                     | 13688.67                         | 3.21                      | 16463.31                     | 7098.13                          | 4.15                      | 3001.29                      | 1318.85                          |
| <b>Zn</b>                                            | 2.61                        | 558                            | 2.64                      | 3307.94                      | 1618.21                          | 2.75                      | 1913.48                      | 973.17                           | 2.69                      | 1314.08                      | 703.96                           |

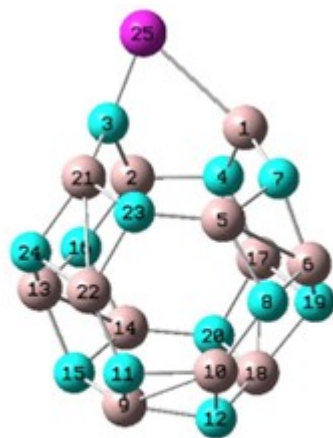

$M@b_{64}Al_{12}N_{12}$

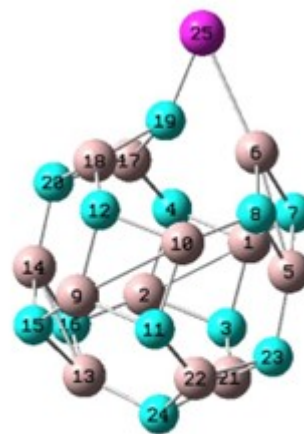

$M@b_{66}Al_{12}N_{12}$

**Scheme S1.** Optimized geometry of the title compounds

| TM | $M@b_{64}$ | $M@b_{66}$ | $M@b_{64}$ | $M@b_{66}$ |
|----|------------|------------|------------|------------|
| Ti |            |            |            |            |
| Fe |            |            |            |            |

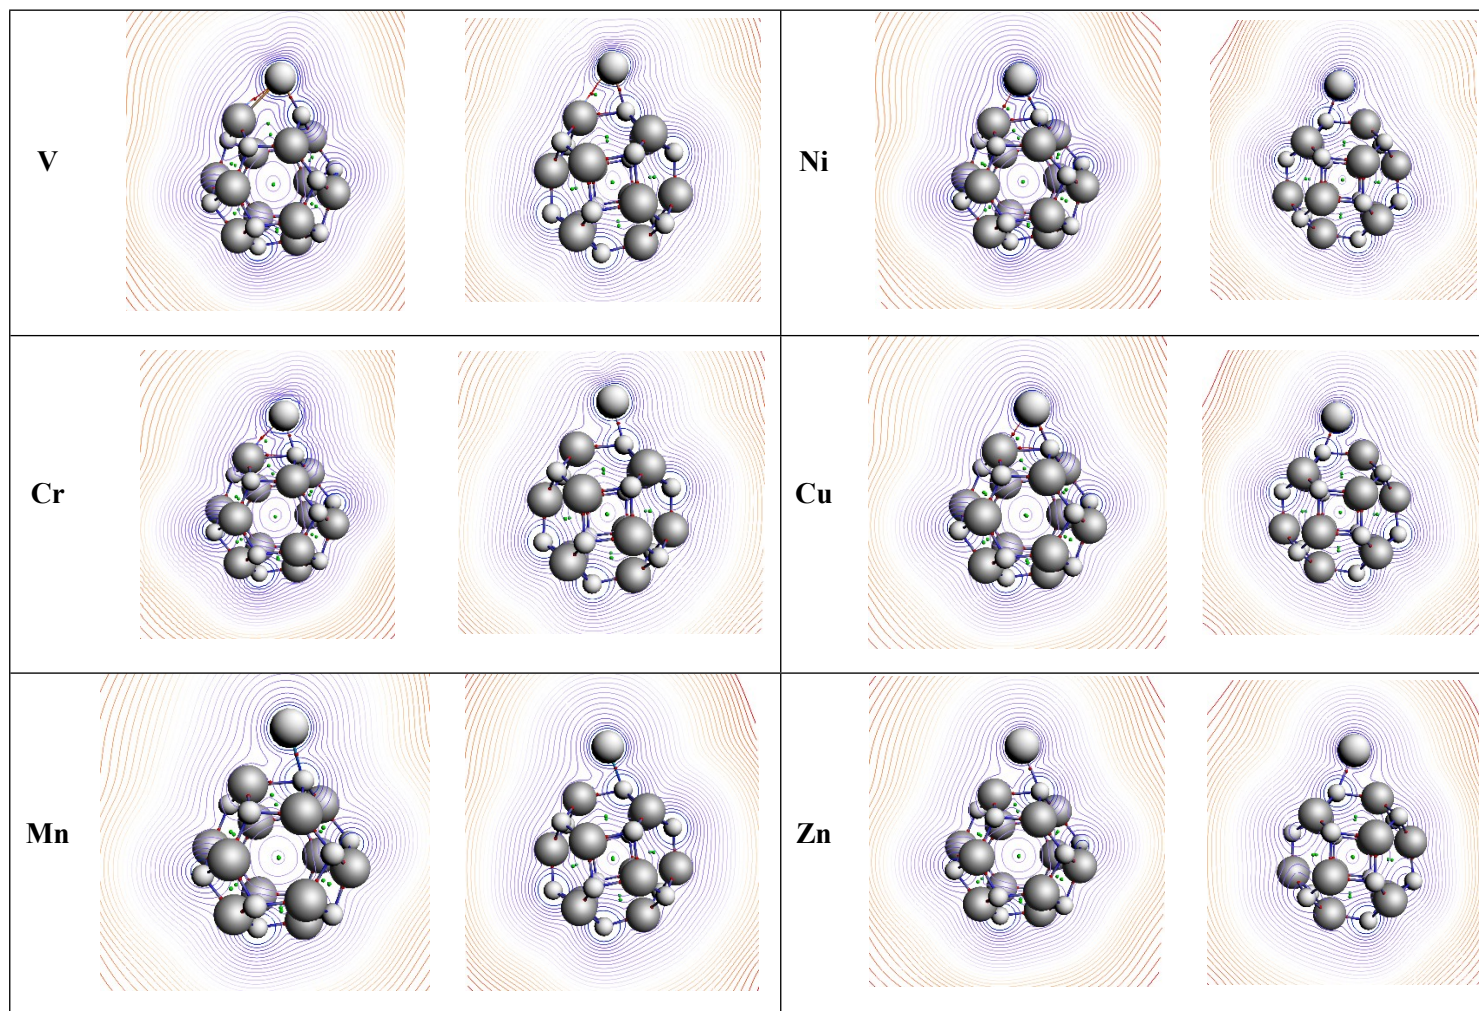

**Figure S1.** Molecular topology of  $M@b_{64/66}Al_{12}N_{12}$  (M= Sc- Zn) where in the nanocage, nitrogen atoms: are small spheres, while aluminum atoms: are large spheres.

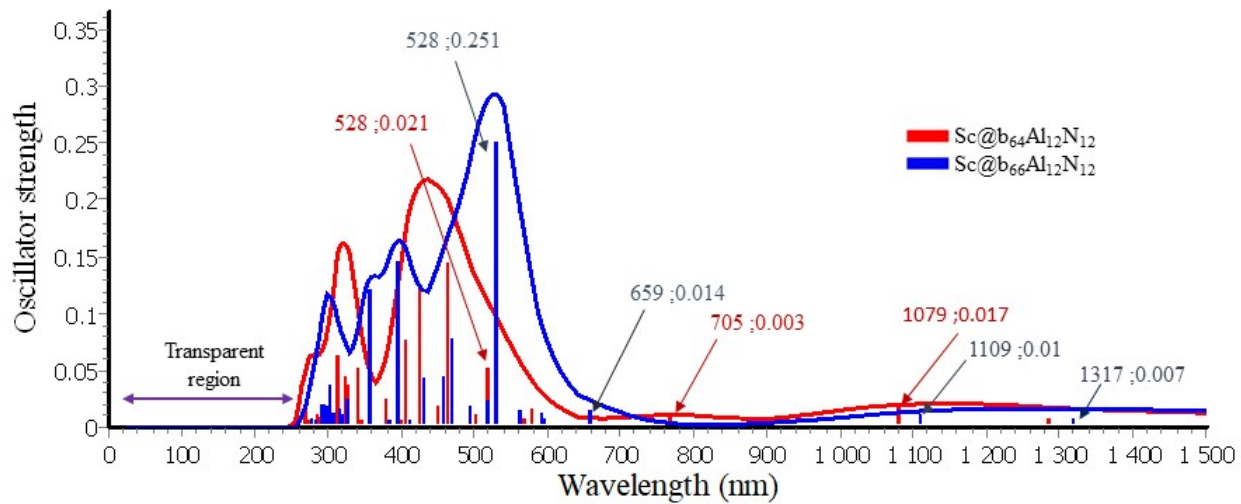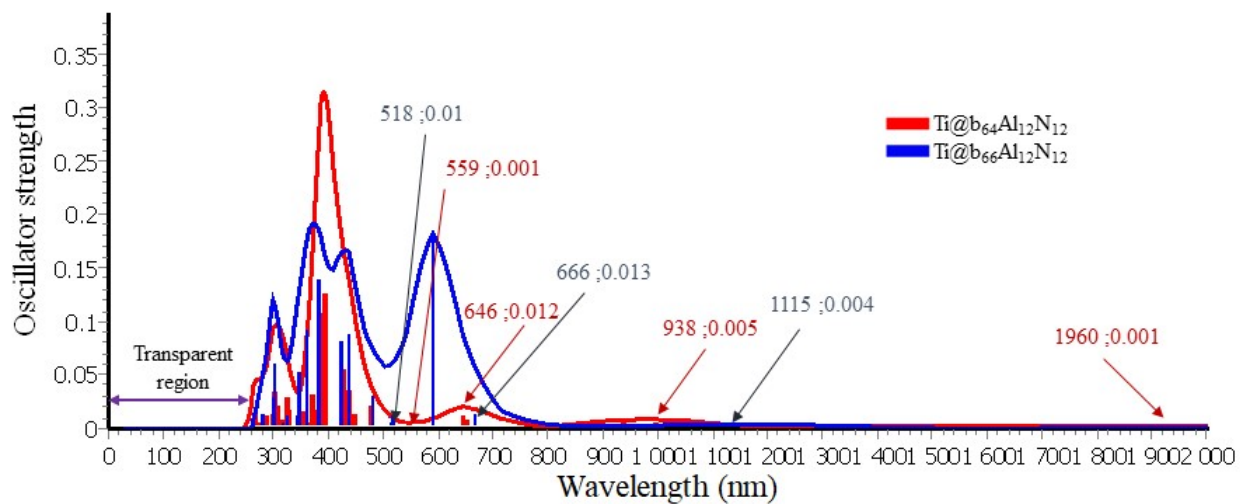

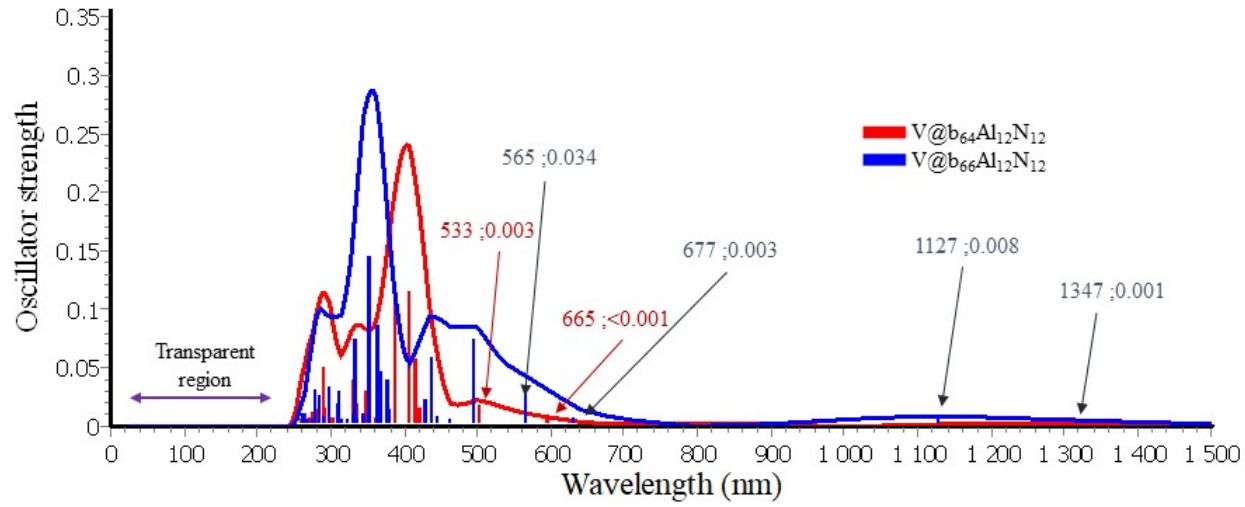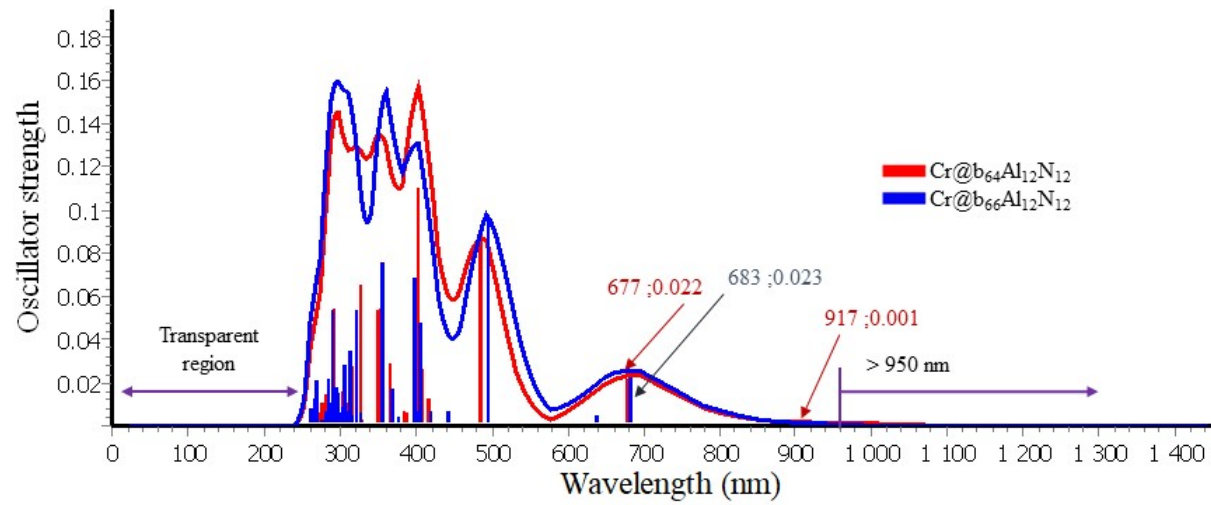

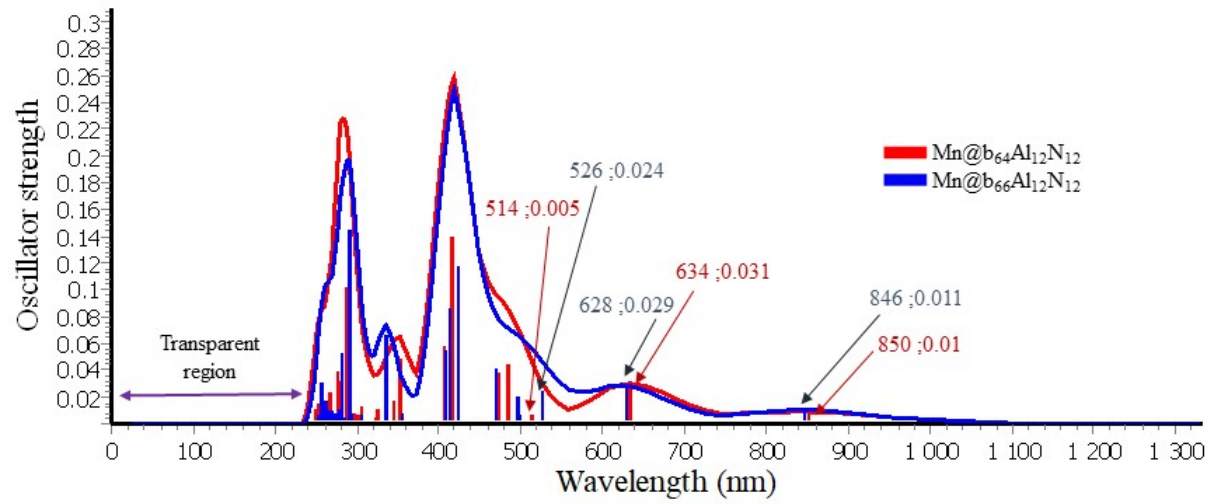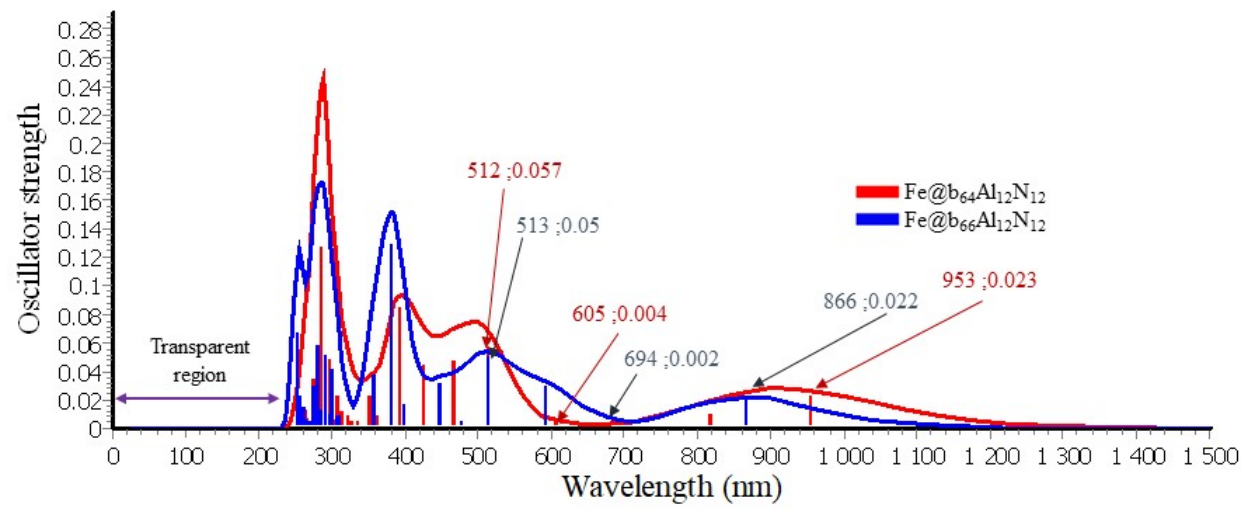



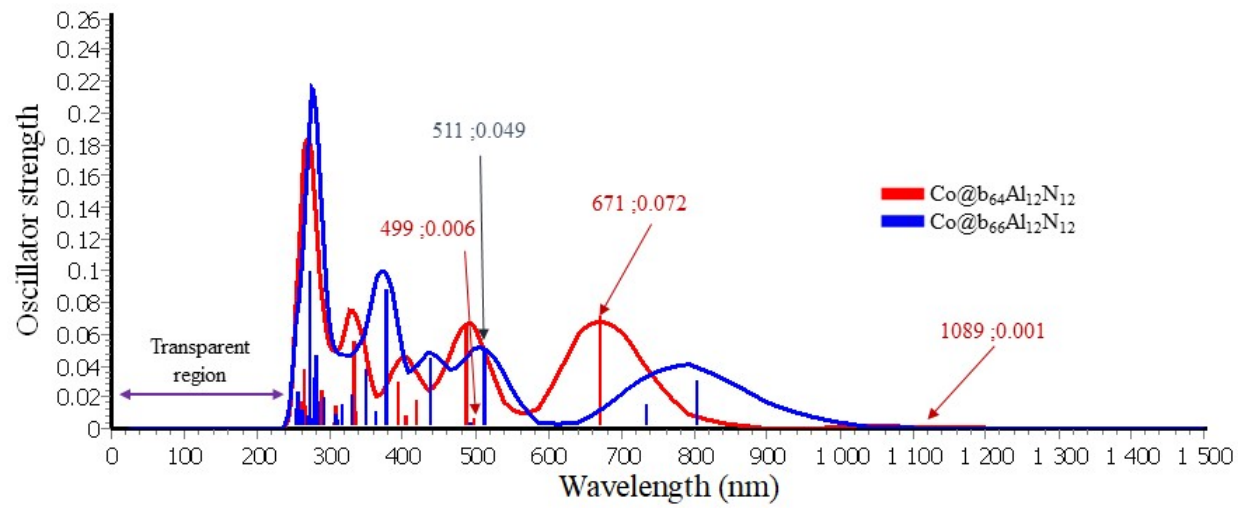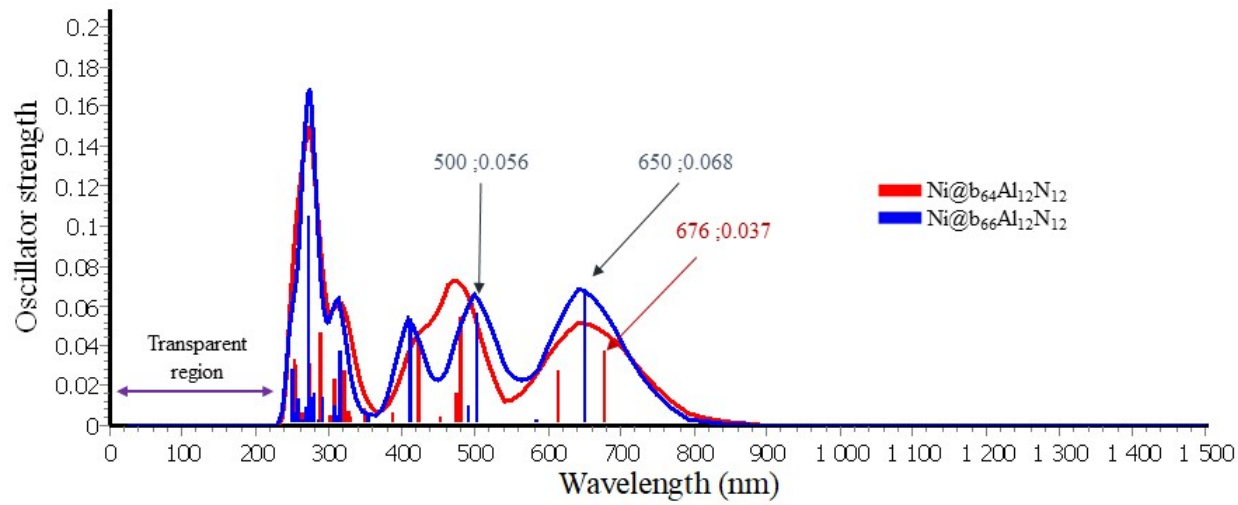

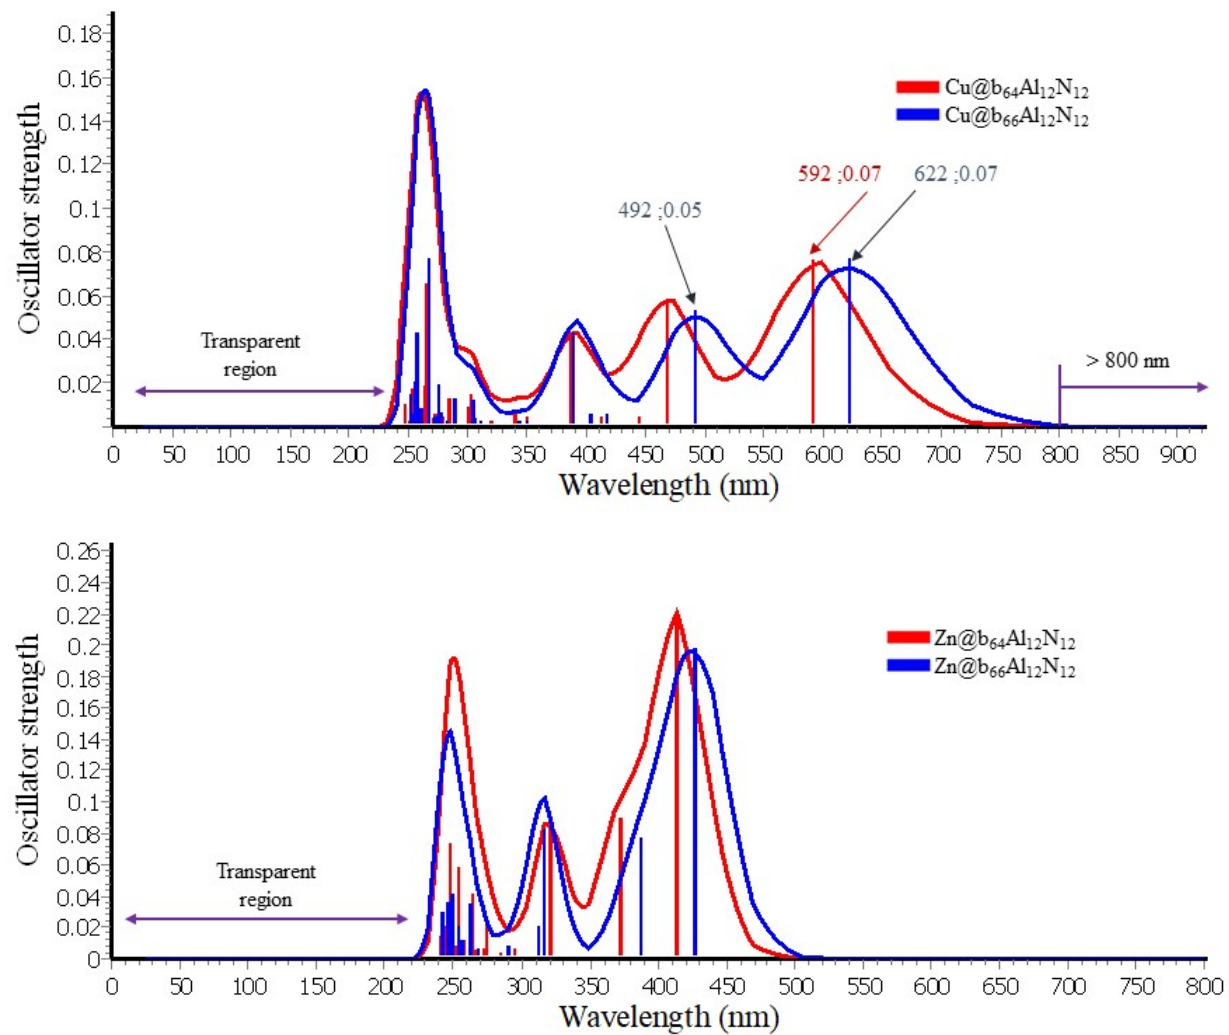

**Figure S2.** Calculated UV – vis absorption spectra of  $M@b_{64/66}\text{Al}_{12}\text{N}_{12}$  (M from Sr to Zn)

| $M@b_{64}Al_{12}N_{12}$  | $S_{0 \rightarrow n}$  | MO                                                                                                                       | (EDDM)                                                                                |
|--------------------------|------------------------|--------------------------------------------------------------------------------------------------------------------------|---------------------------------------------------------------------------------------|
|                          |                        | ( $\beta$ HOMO $\rightarrow$ $\beta$ LUMO)) <b>49 %</b>                                                                  | ICT in Metal Sc                                                                       |
|                          | $S_{0 \rightarrow 5}$  | 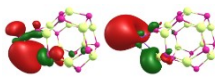                                        |    |
|                          |                        | ( $\beta$ HOMO $\rightarrow$ $\beta$ LUMO)+4) <b>10%</b> ( $\alpha$ HOMO $\rightarrow$ $\alpha$ LUMO)) <b>36%</b>        | ICT in Metal Sc + MLCT from Sc to nanocage                                            |
| $Sc@b_{64}Al_{12}N_{12}$ | $S_{0 \rightarrow 11}$ |                                        |    |
|                          |                        | ( $\alpha$ HOMO-1 $\rightarrow$ $\alpha$ LUMO)+1) <b>15%</b> ( $\beta$ HOMO $\rightarrow$ $\beta$ LUMO)+1) <b>31%</b>    | ICT in Metal Sc + MLCT from Sc to nanocage                                            |
|                          | $S_{0 \rightarrow 13}$ |                                        |    |
|                          |                        | ( $\beta$ HOMO $\rightarrow$ $\beta$ LUMO)+2) <b>18%</b> ( $\alpha$ HOMO-1 $\rightarrow$ $\alpha$ LUMO)+3)<br><b>29%</b> | ICT in Metal Sc + MLCT from Sc to nanocage                                            |
|                          | $S_{0 \rightarrow 15}$ |                                        |    |
|                          |                        | ( $\alpha$ HOMO $\rightarrow$ $\alpha$ LUMO)+1) <b>22%</b>                                                               | ICT in Metal Ti                                                                       |
|                          | $S_{0 \rightarrow 5}$  |                                       |   |
|                          |                        | ( $\beta$ HOMO $\rightarrow$ $\beta$ LUMO)+1) <b>10%</b> ( $\alpha$ HOMO $\rightarrow$ $\alpha$ LUMO)) <b>43%</b>        | ICT in Metal Ti + MLCT from Ti to nanocage                                            |
| $Ti@b_{64}Al_{12}N_{12}$ | $S_{0 \rightarrow 15}$ |                                      |  |
|                          |                        | ( $\alpha$ HOMO-2 $\rightarrow$ $\alpha$ LUMO)+3) <b>13%</b> ( $\beta$ HOMO $\rightarrow$ $\beta$ LUMO)+3) <b>11%</b>    | ICT in Metal Ti + MLCT from Ti to nanocage                                            |
|                          | $S_{0 \rightarrow 18}$ |                                       |  |

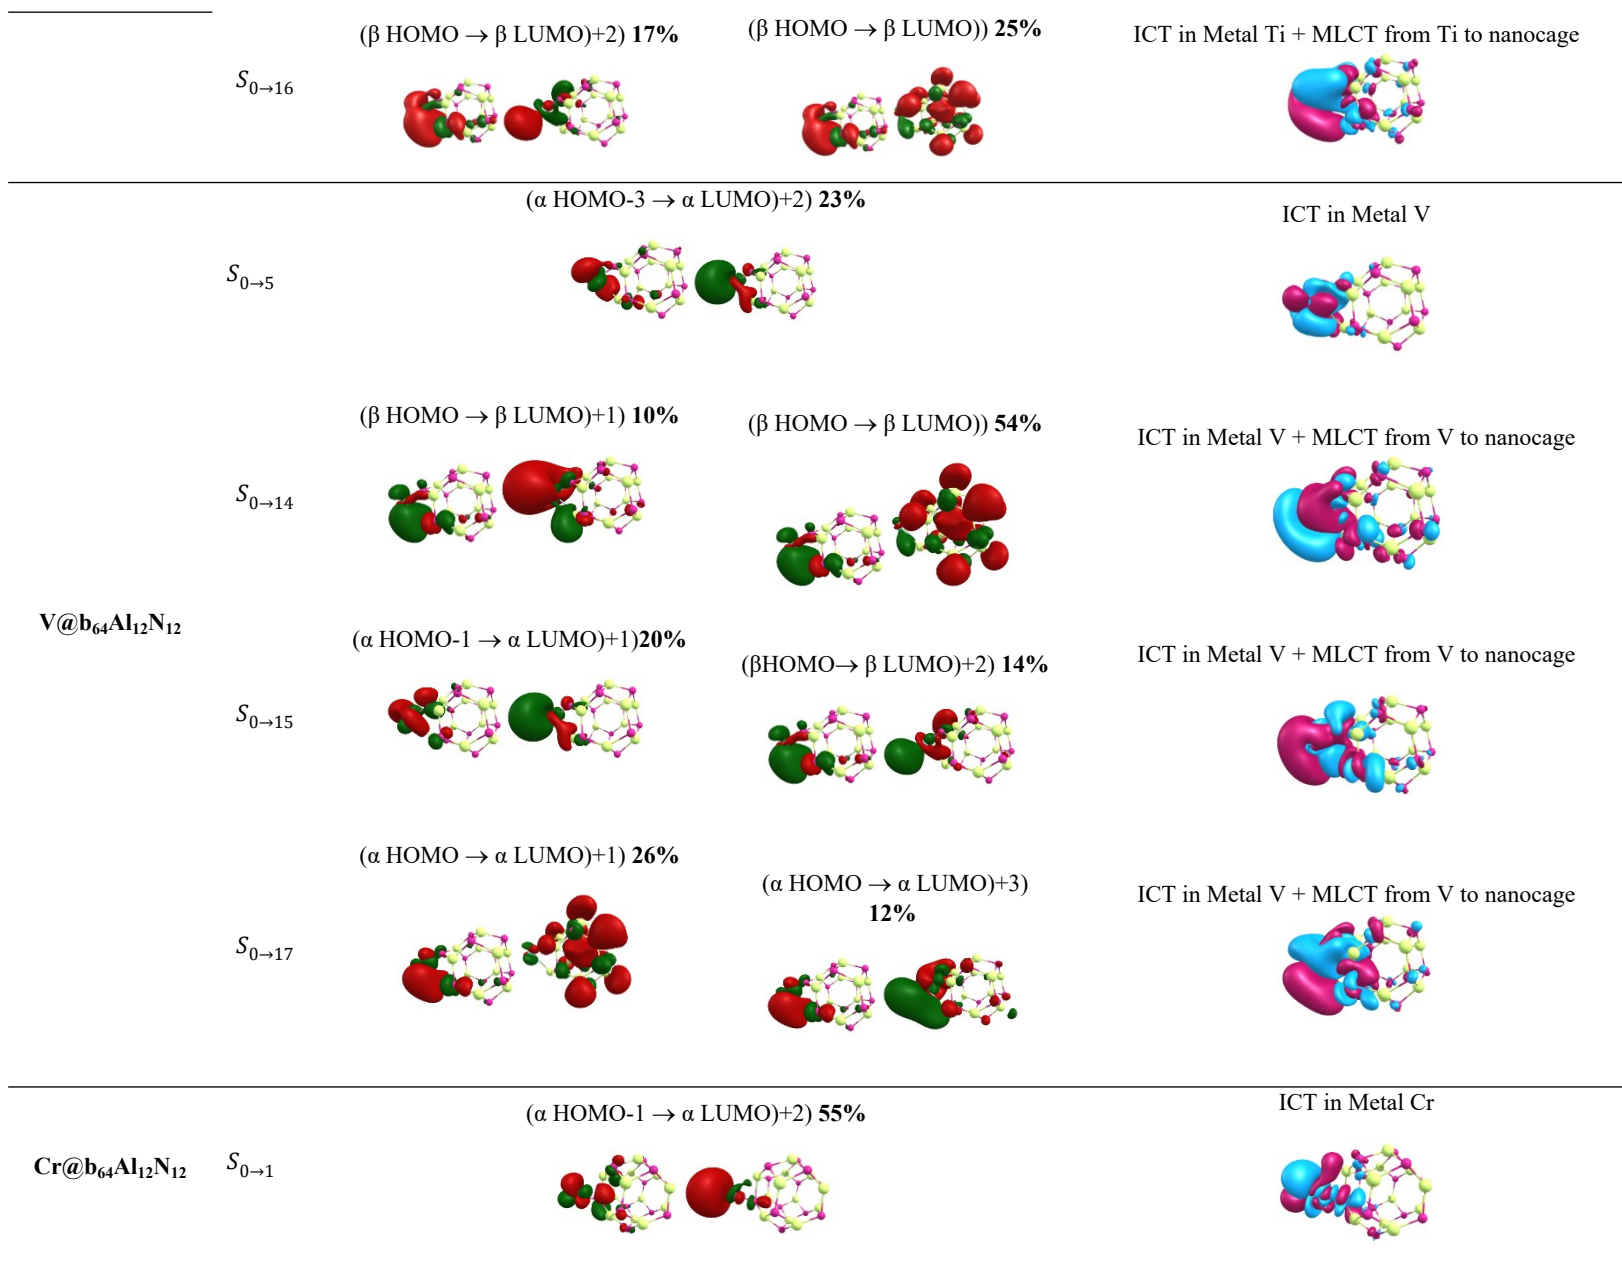

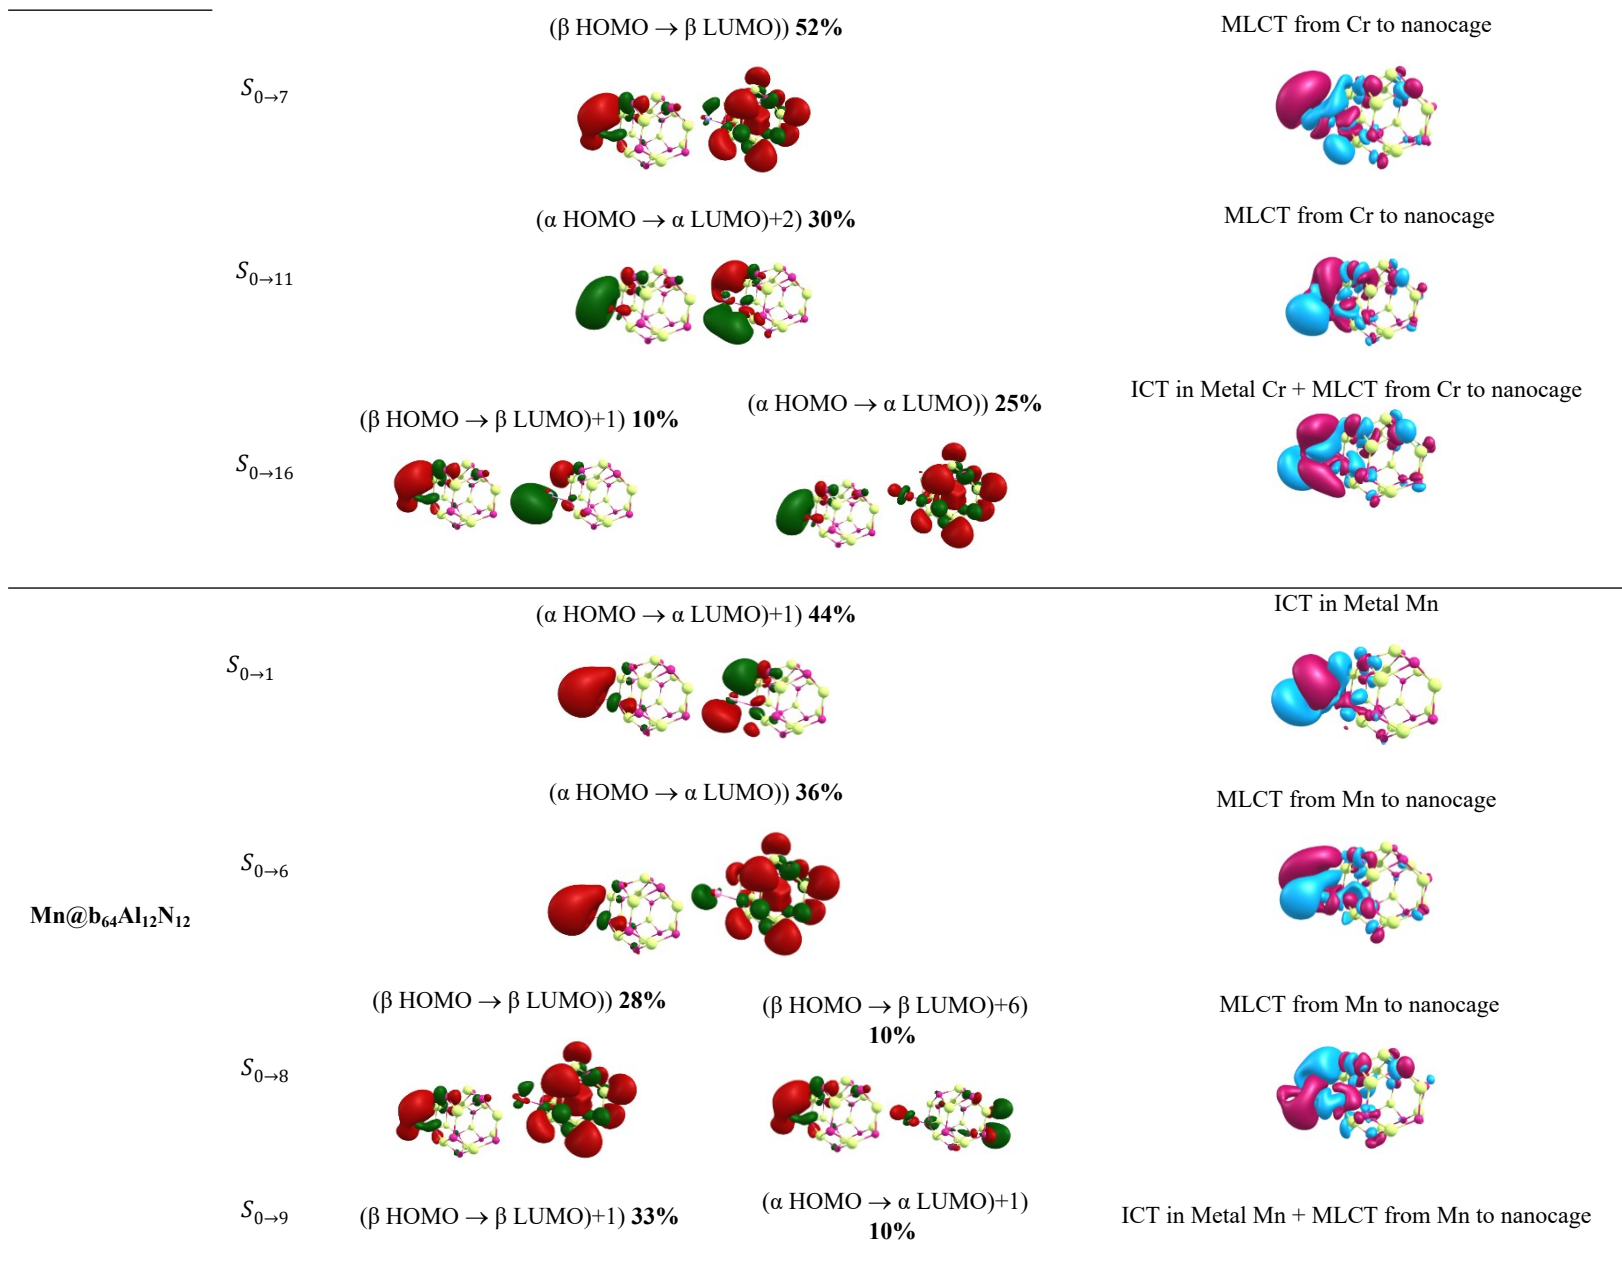

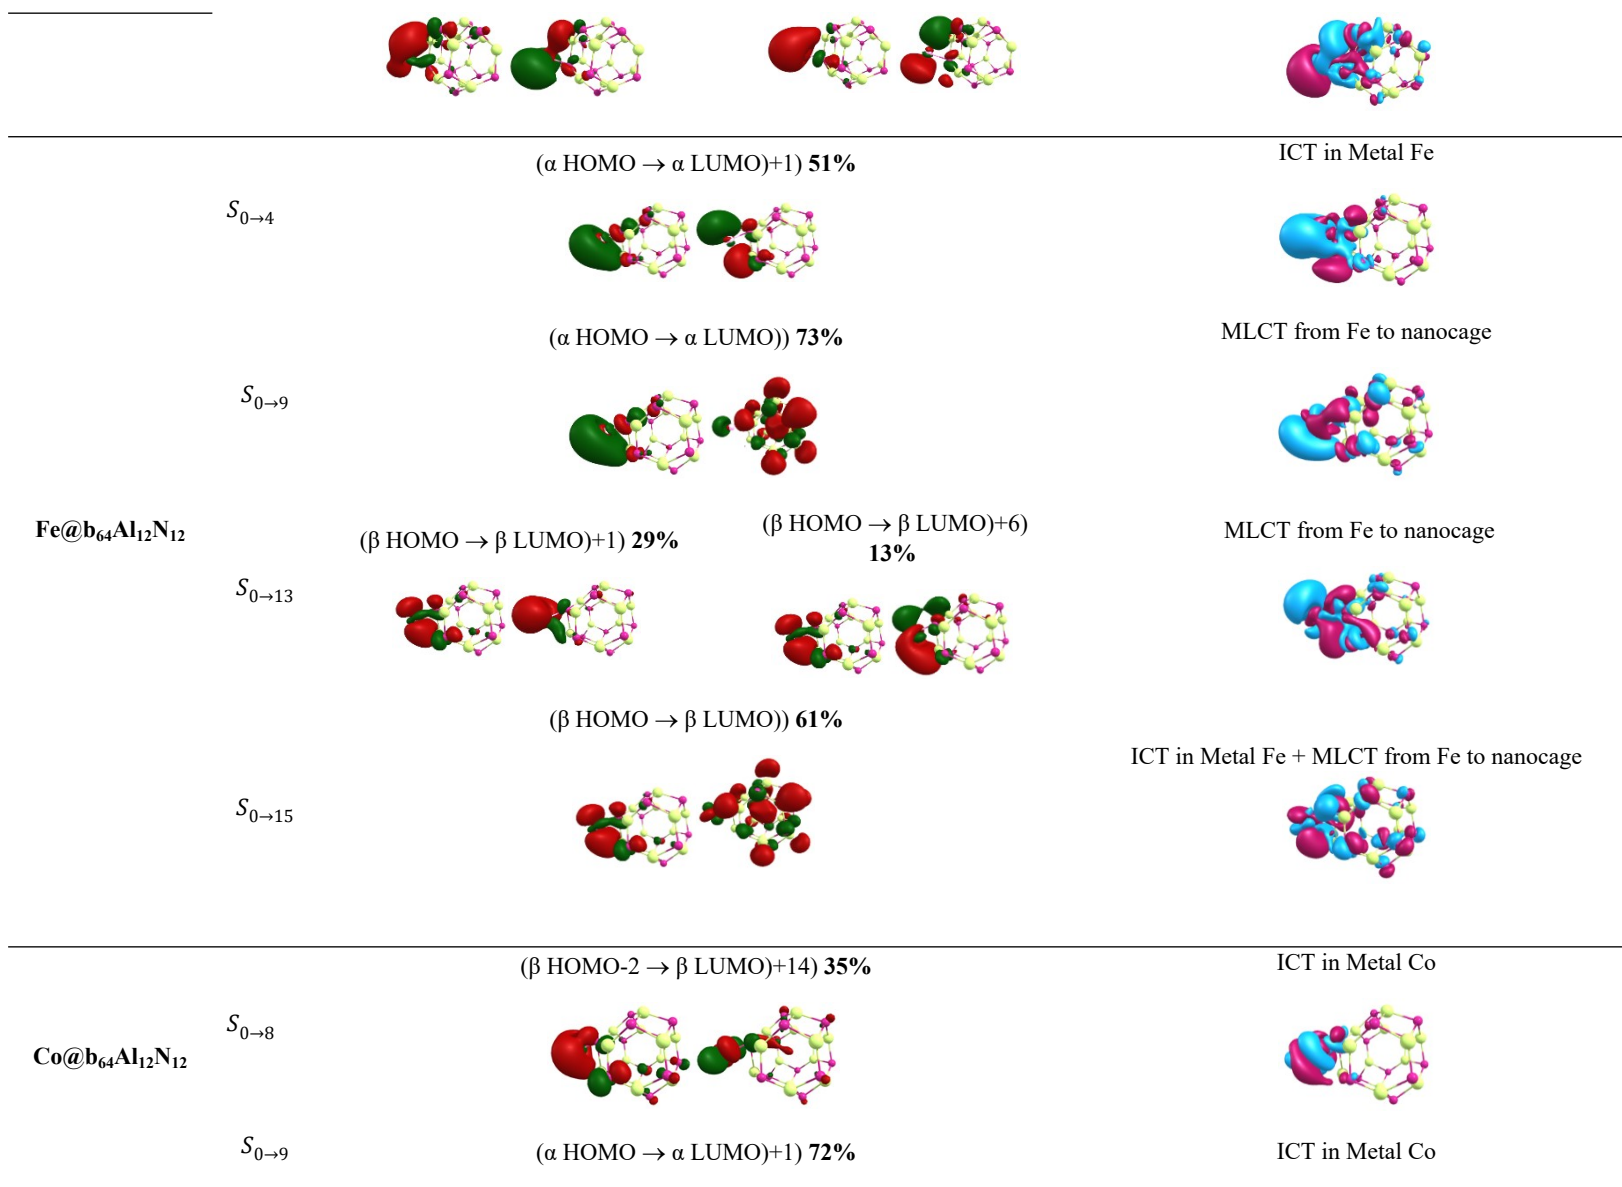

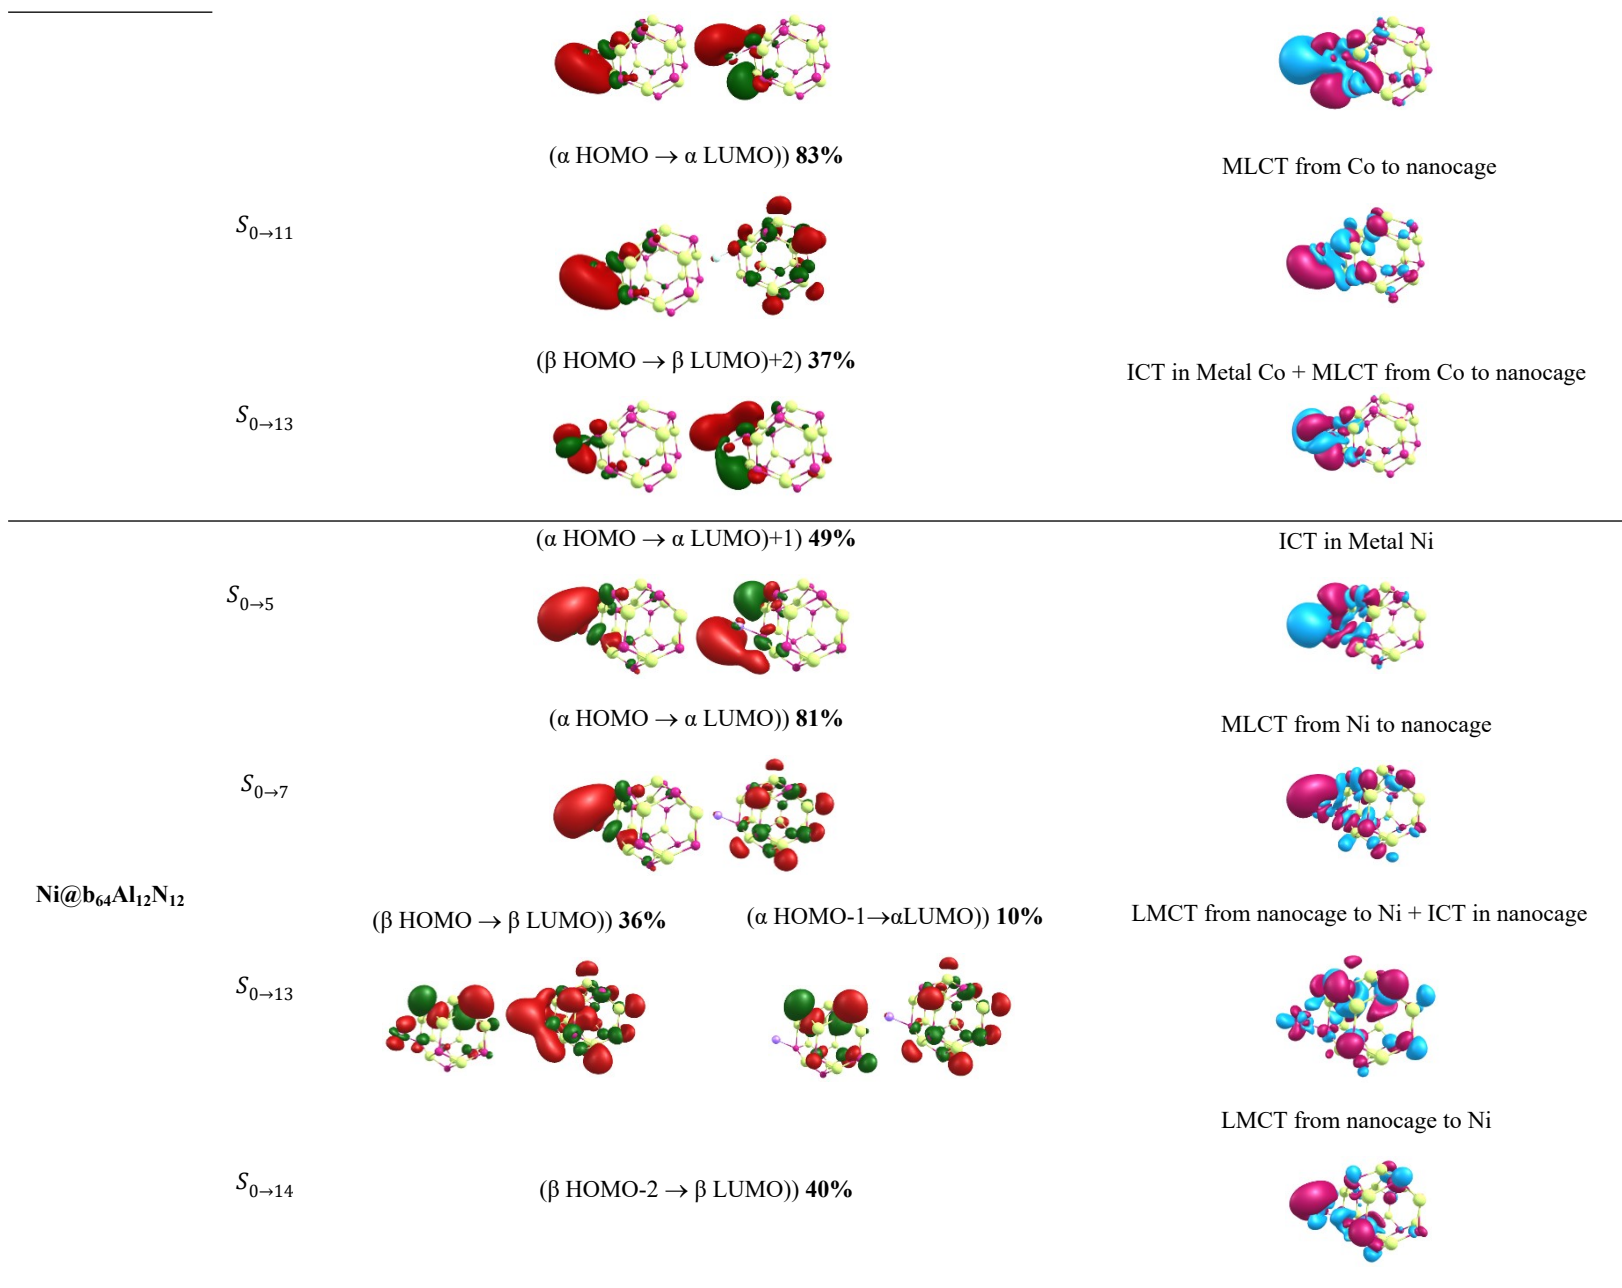

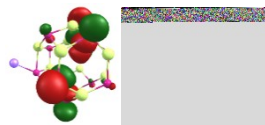

|                                                       |                        |                                                                 |                          |
|-------------------------------------------------------|------------------------|-----------------------------------------------------------------|--------------------------|
|                                                       |                        | $(\alpha \text{ HOMO} \rightarrow \alpha \text{ LUMO})+1$ ) 81% | ICT in Metal Cu          |
|                                                       | $S_{0 \rightarrow 1}$  |                                                                 |                          |
|                                                       |                        | $(\alpha \text{ HOMO} \rightarrow \alpha \text{ LUMO})$ ) 83%   | MLCT from Cu to nanocage |
|                                                       | $S_{0 \rightarrow 2}$  |                                                                 |                          |
| <b>Cu@b<sub>64</sub>Al<sub>12</sub>N<sub>12</sub></b> |                        | $(\beta \text{ HOMO} \rightarrow \beta \text{ LUMO})$ ) 55%     | LMCT from nanocage to Cu |
|                                                       | $S_{0 \rightarrow 9}$  |                                                                 |                          |
|                                                       |                        | $(\beta \text{ HOMO}-1 \rightarrow \beta \text{ LUMO})$ ) 56%   | LMCT from nanocage to Cu |
|                                                       | $S_{0 \rightarrow 11}$ |                                                                 |                          |
|                                                       |                        | $(\text{HOMO} \rightarrow \text{LUMO})+1$ ) 43%                 | ICT in Metal Zn          |
| <b>Zn@b<sub>64</sub>Al<sub>12</sub>N<sub>12</sub></b> | $S_{0 \rightarrow 3}$  |                                                                 |                          |
|                                                       | $S_{0 \rightarrow 5}$  | $(\text{HOMO} \rightarrow \text{LUMO})$ ) 39%                   | MLCT from Zn to nanocage |



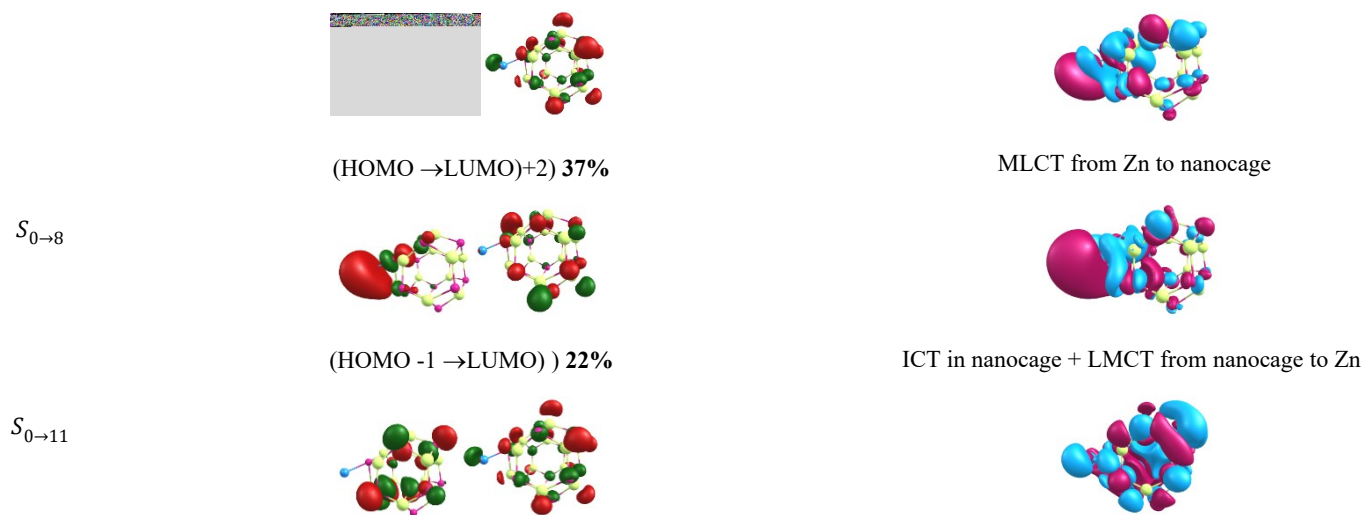

| $M@b_{66}Al_{12}N_{12}$  | $S_{0 \rightarrow n}$  | MO                                              | EDDM                                       |
|--------------------------|------------------------|-------------------------------------------------|--------------------------------------------|
|                          |                        | ( $\alpha$ HOMO → $\alpha$ LUMO+1) <b>30%</b>   | ICT in Metal Sc                            |
|                          | $S_{0 \rightarrow 6}$  |                                                 |                                            |
|                          |                        | ( $\alpha$ HOMO → $\alpha$ LUMO) <b>45%</b>     | MLCT from Sc to nanocage                   |
| $Sc@b_{66}Al_{12}N_{12}$ | $S_{0 \rightarrow 10}$ |                                                 |                                            |
|                          |                        | ( $\alpha$ HOMO-1 → $\alpha$ LUMO+2) <b>22%</b> | ICT in Metal Sc + MLCT from Sc to nanocage |
|                          |                        | ( $\beta$ HOMO → $\beta$ LUMO) <b>20%</b>       |                                            |
|                          | $S_{0 \rightarrow 13}$ |                                                 |                                            |
|                          | $S_{0 \rightarrow 24}$ | ( $\alpha$ HOMO-1 → $\alpha$ LUMO+3) <b>19%</b> | ICT in Metal Sc + LMCT from nanocage to Sc |
|                          |                        | ( $\beta$ HOMO → $\beta$ LUMO+2) <b>21%</b>     |                                            |

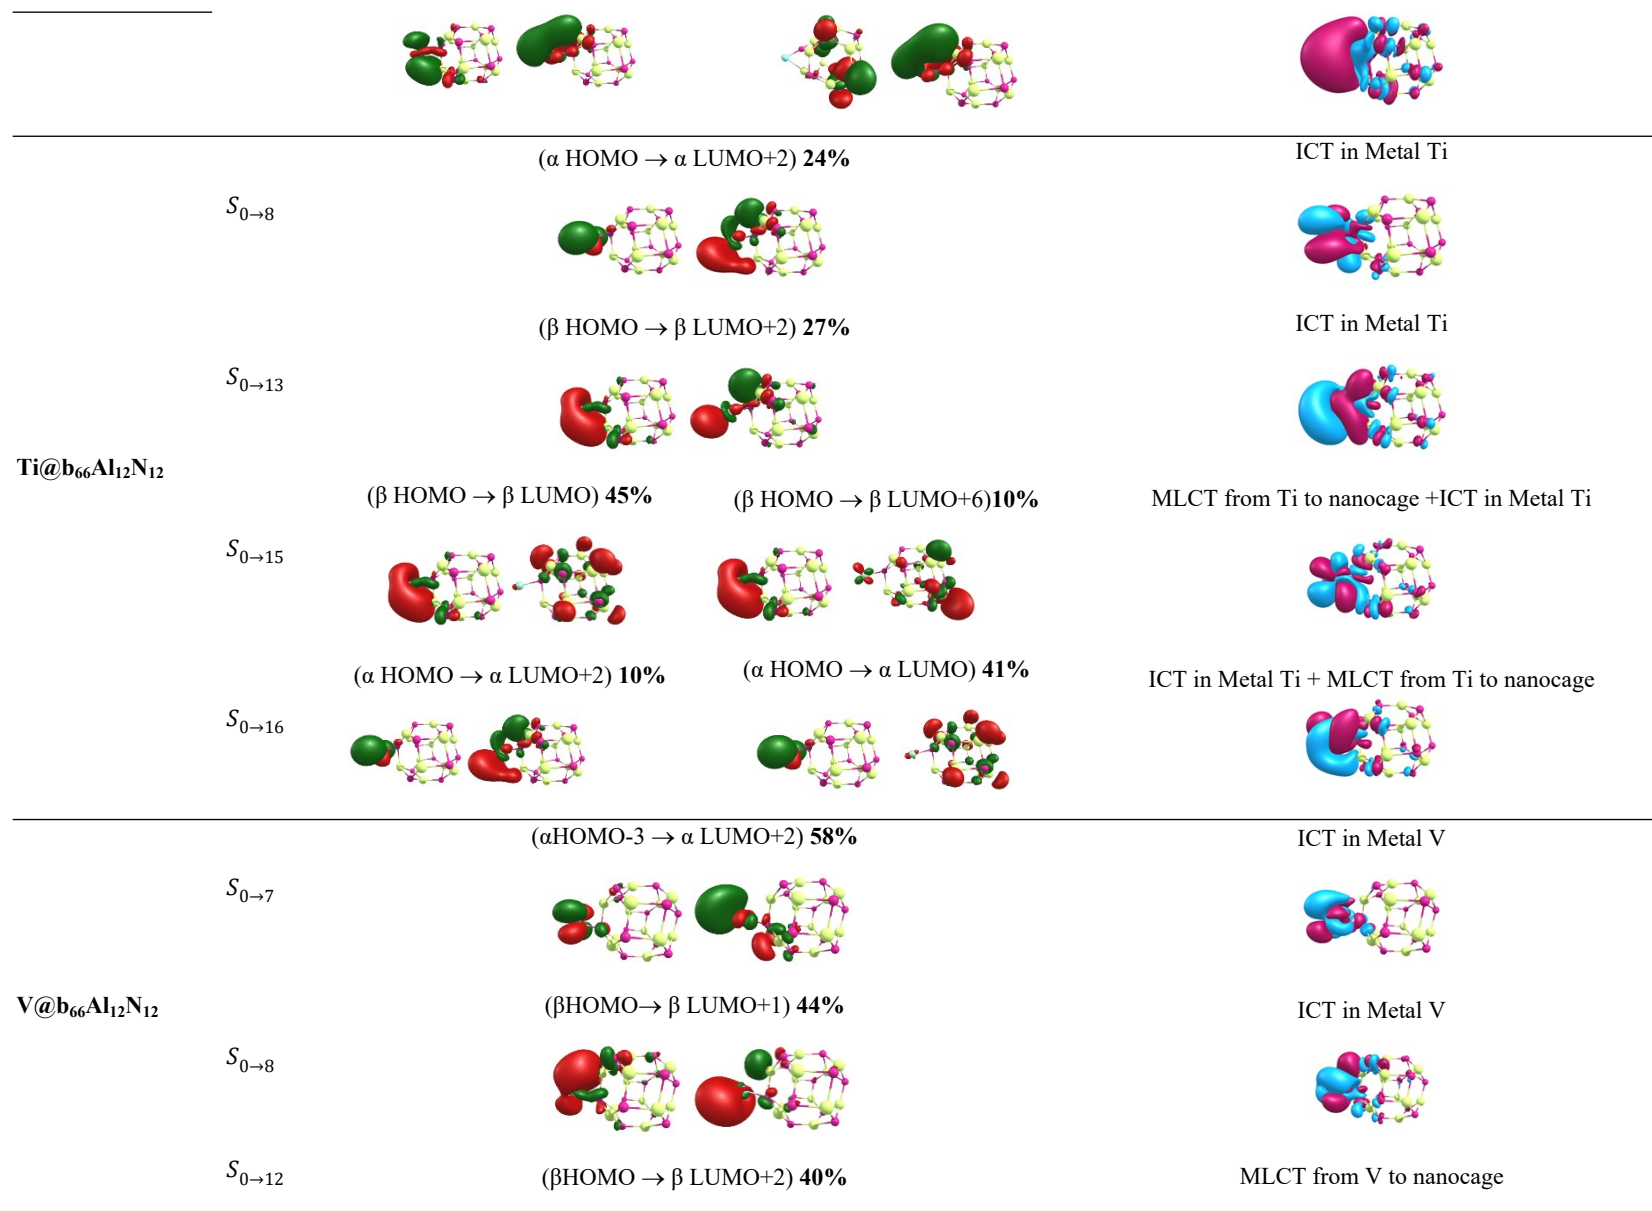

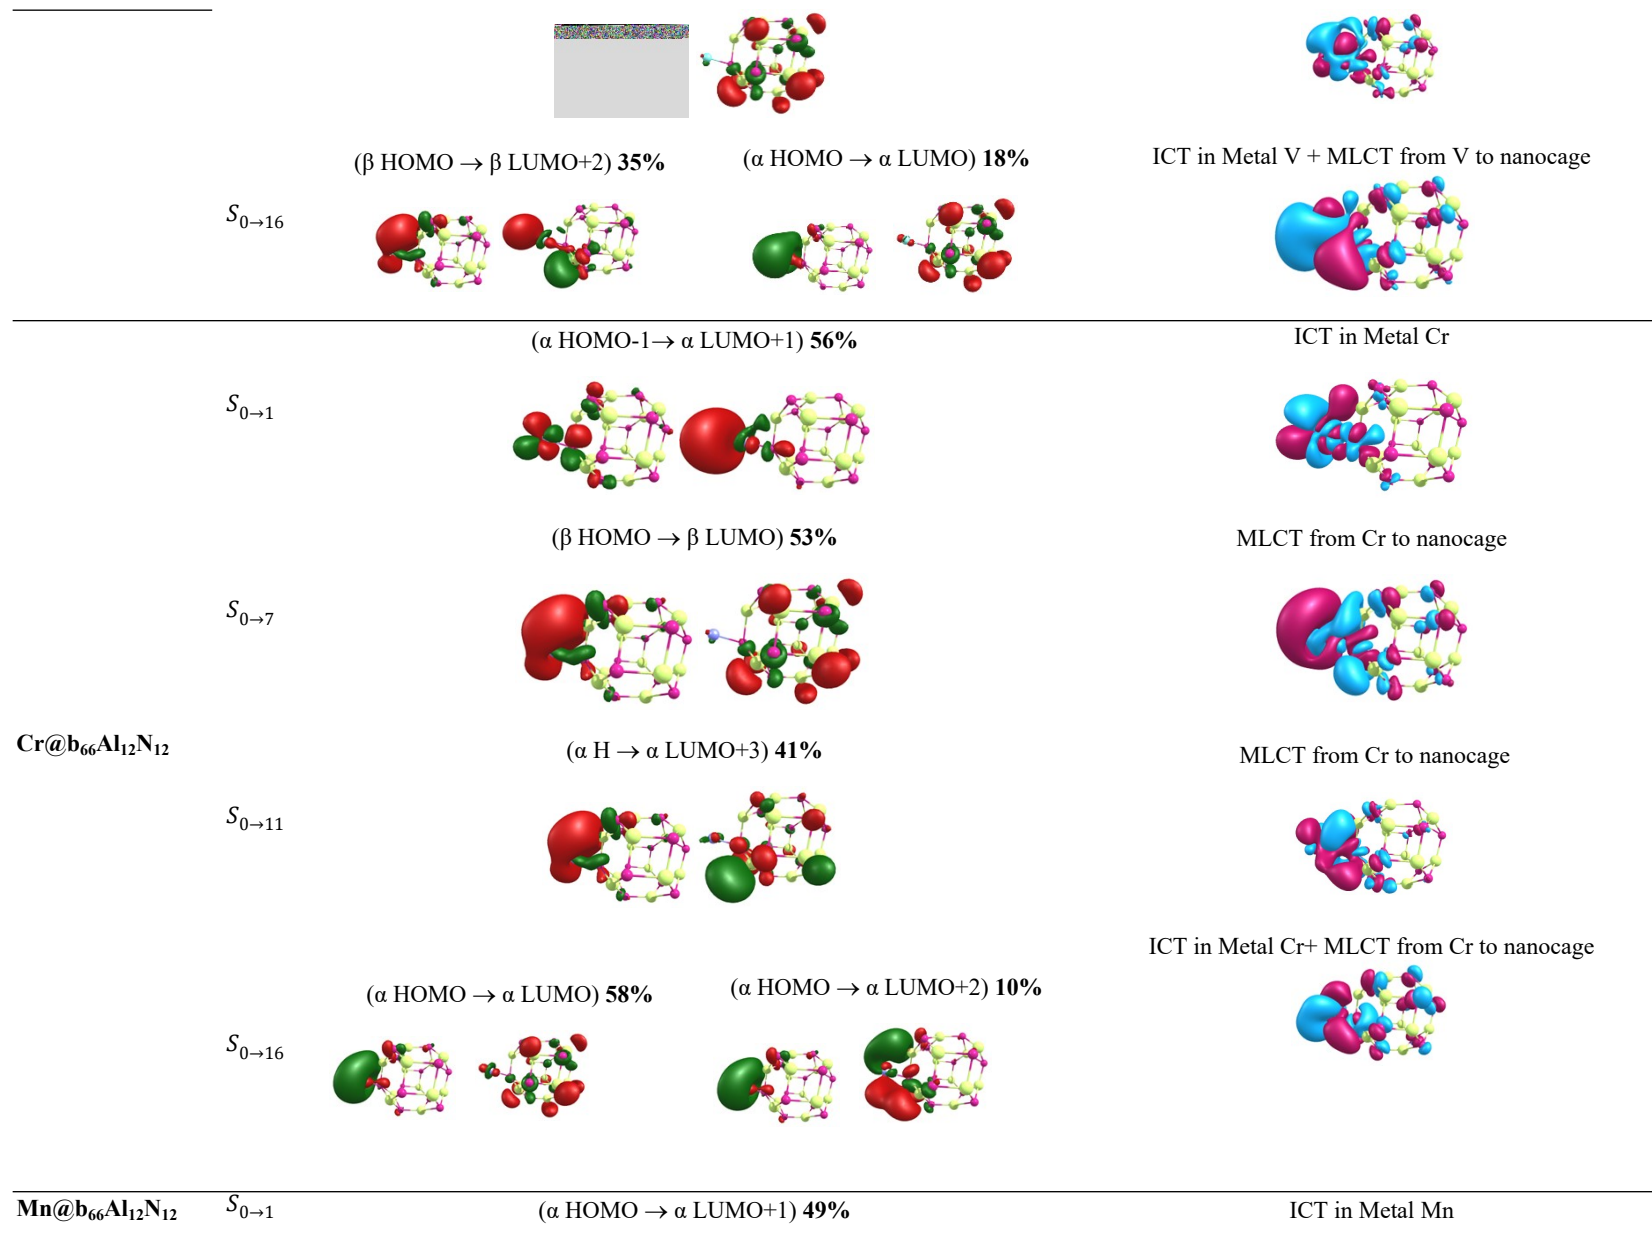

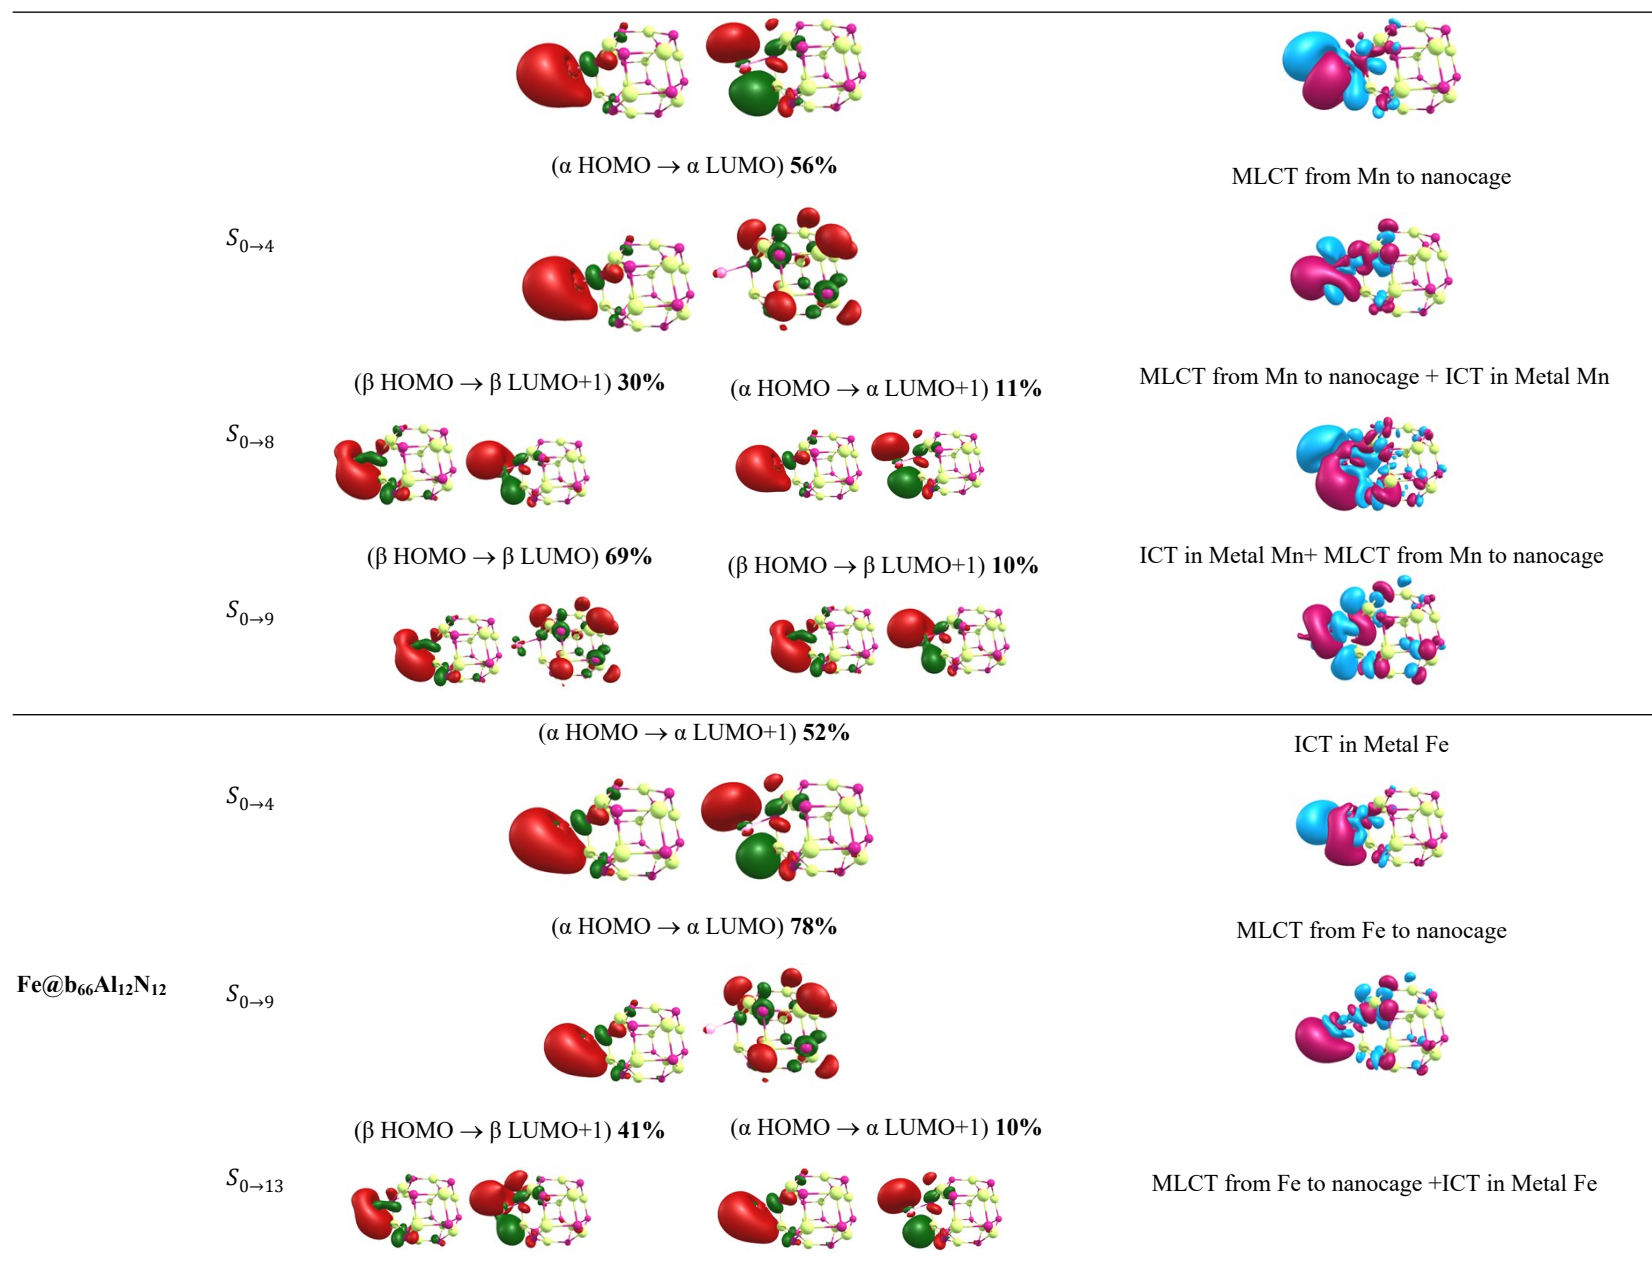

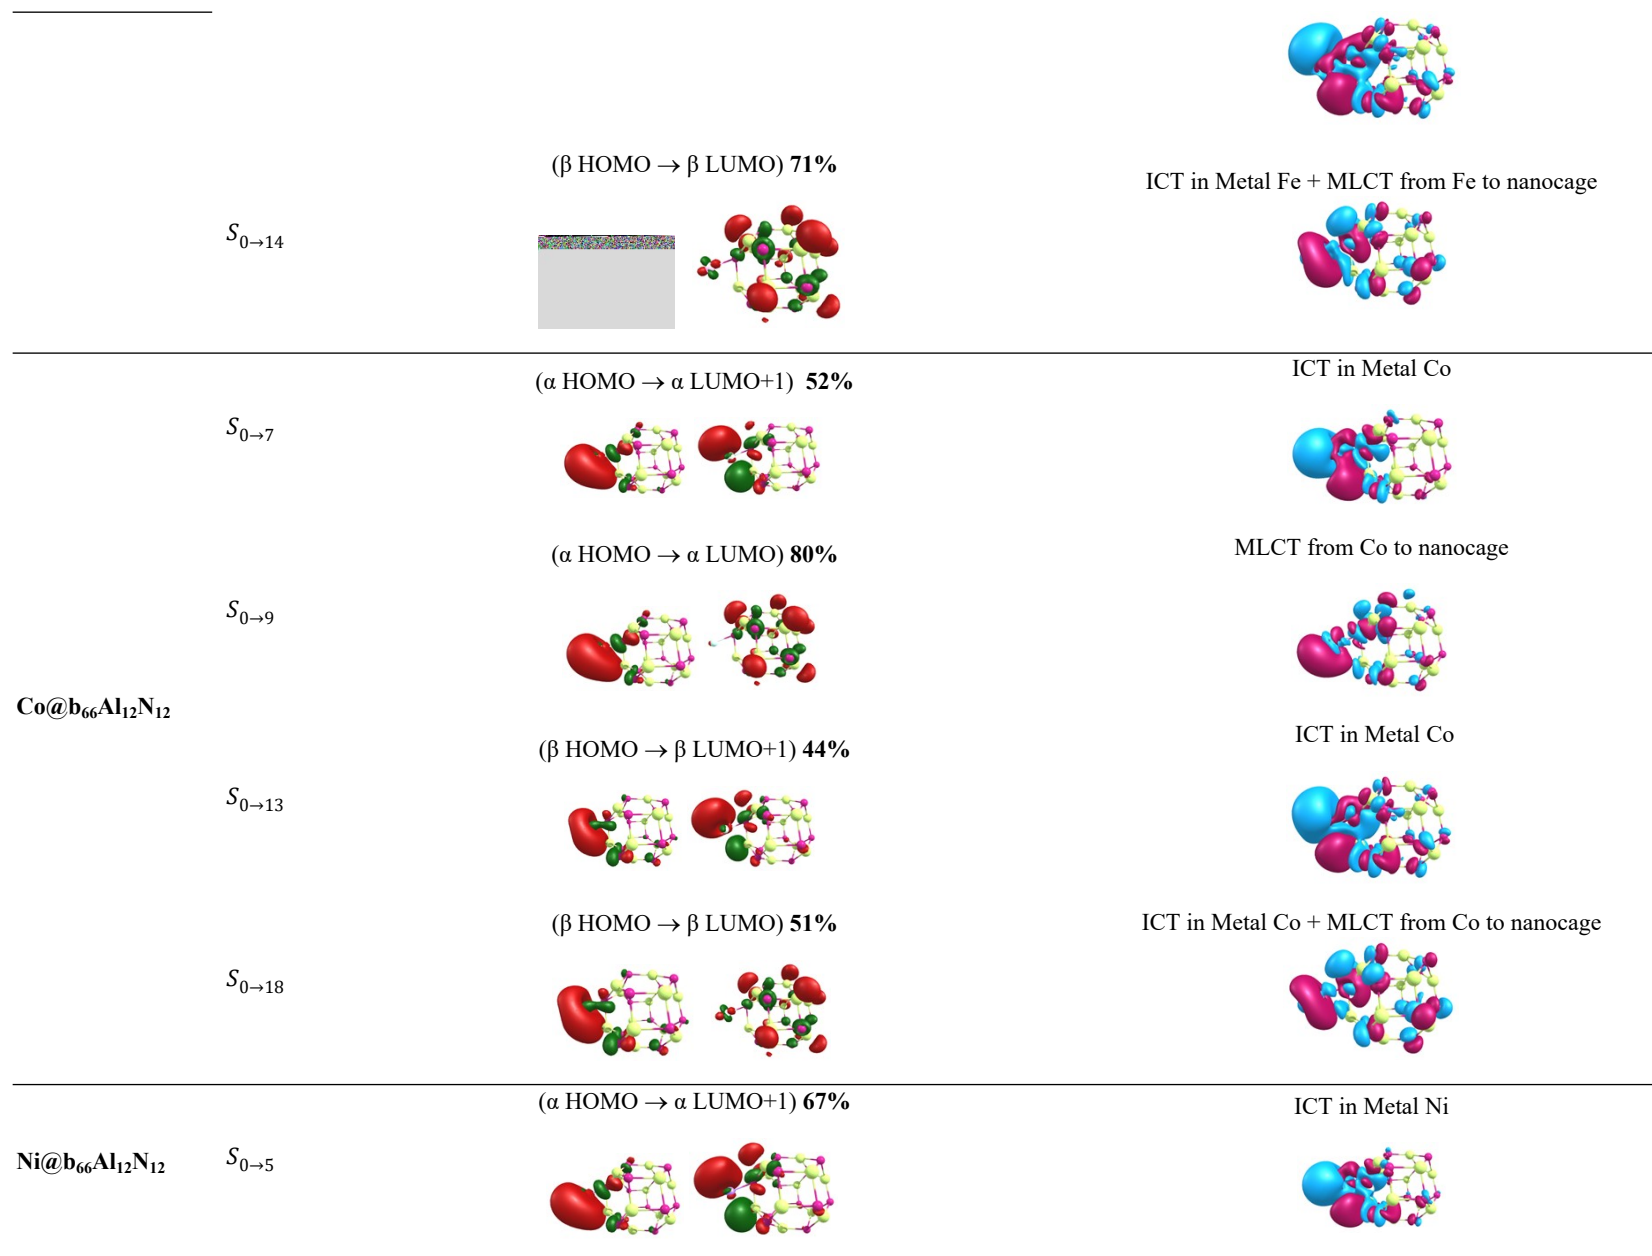

|                                                       |                        |                                                                                      |                                                                                       |
|-------------------------------------------------------|------------------------|--------------------------------------------------------------------------------------|---------------------------------------------------------------------------------------|
|                                                       |                        | ( $\alpha$ HOMO $\rightarrow$ $\alpha$ LUMO) <b>83%</b>                              | MLCT from Ni to nanocage                                                              |
|                                                       | $S_{0 \rightarrow 7}$  | 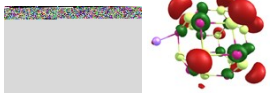   |    |
|                                                       |                        | ( $\beta$ HOMO $\rightarrow$ $\beta$ LUMO) <b>69%</b>                                | LMCT from nanocage to Ni + ICT in nanocage                                            |
|                                                       | $S_{0 \rightarrow 14}$ |    |    |
|                                                       |                        | ( $\beta$ HOMO-1 $\rightarrow$ $\beta$ LUMO) <b>27%</b>                              | ICT in Metal Ni + MLCT from Metal Ni to nanocage                                      |
|                                                       | $S_{0 \rightarrow 16}$ |    |    |
|                                                       |                        | ( $\alpha$ HOMO $\rightarrow$ $\alpha$ LUMO+1) <b>78%</b>                            | ICT in Metal Cu                                                                       |
|                                                       | $S_{0 \rightarrow 1}$  |    |    |
|                                                       |                        | ( $\alpha$ HOMO $\rightarrow$ $\alpha$ LUMO) <b>85%</b>                              | MLCT from Cu to nanocage                                                              |
|                                                       | $S_{0 \rightarrow 2}$  |   |   |
| <b>Cu@b<sub>66</sub>Al<sub>12</sub>N<sub>12</sub></b> |                        | ( $\beta$ HOMO $\rightarrow$ $\beta$ LUMO) <b>69%</b>                                | LMCT from nanocage to Cu                                                              |
|                                                       | $S_{0 \rightarrow 9}$  |  |  |
|                                                       | $S_{0 \rightarrow 12}$ | ( $\beta$ HOMO-1 $\rightarrow$ $\beta$ LUMO) <b>48%</b>                              | LMCT from nanocage to Cu                                                              |

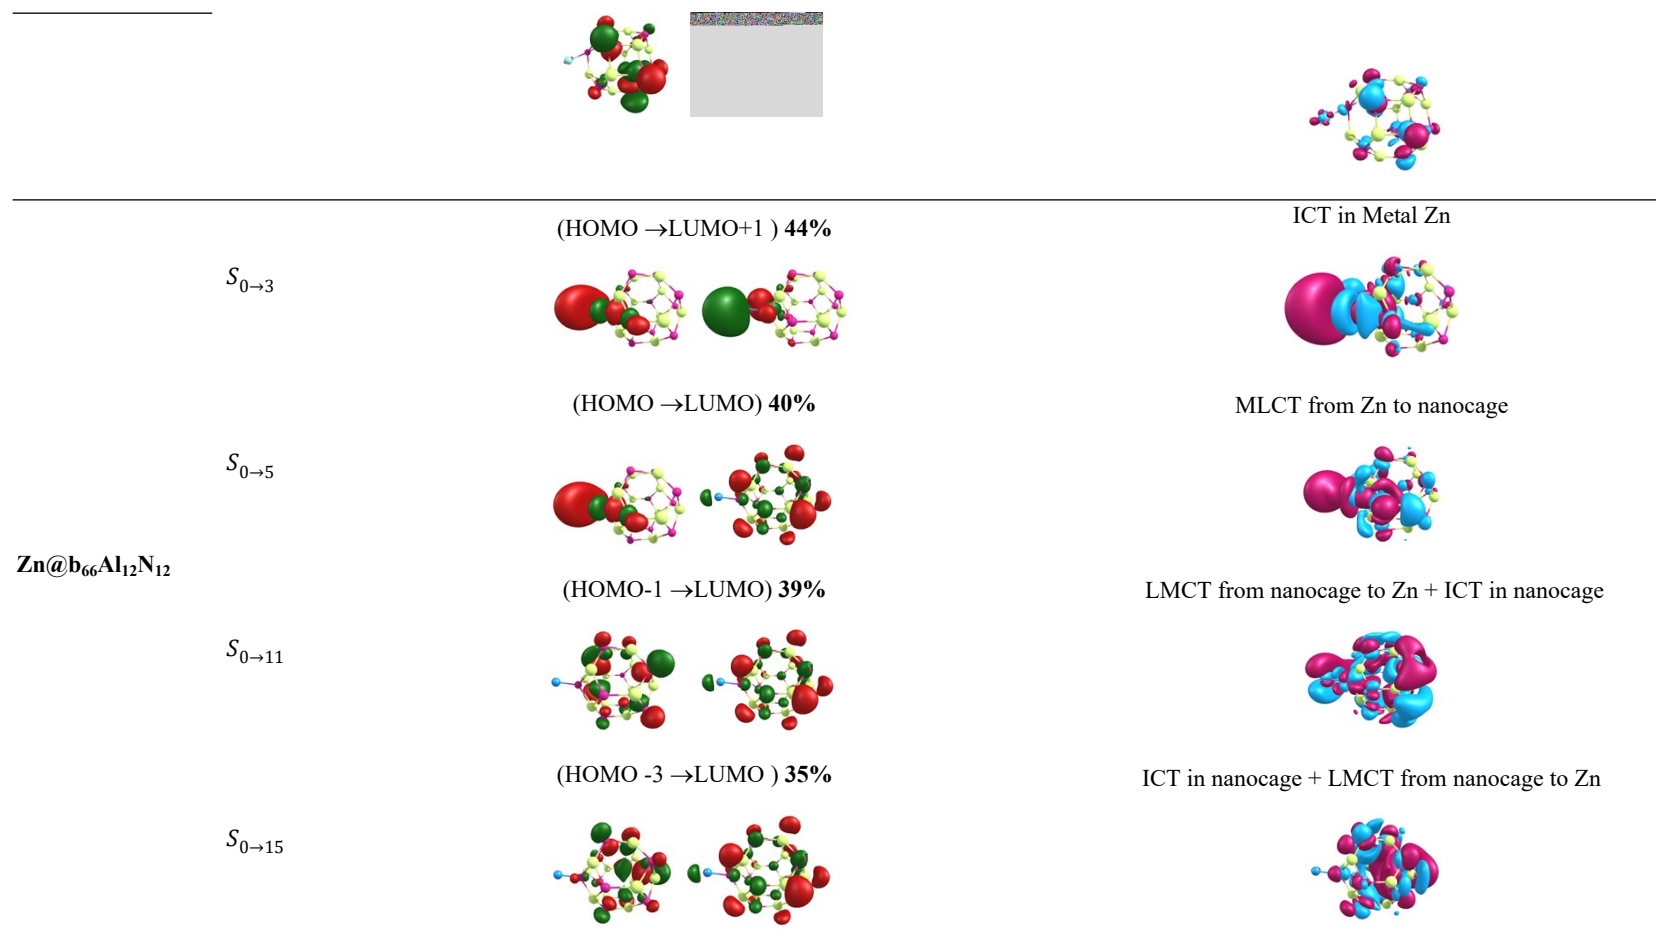

**Figure S3.** Molecular orbitals (MO) and electron density difference maps (EDDM) for the crucial excited states of **M@b<sub>64</sub>Al<sub>12</sub>N<sub>12</sub>** and **M@b<sub>66</sub>Al<sub>12</sub>N<sub>12</sub>**

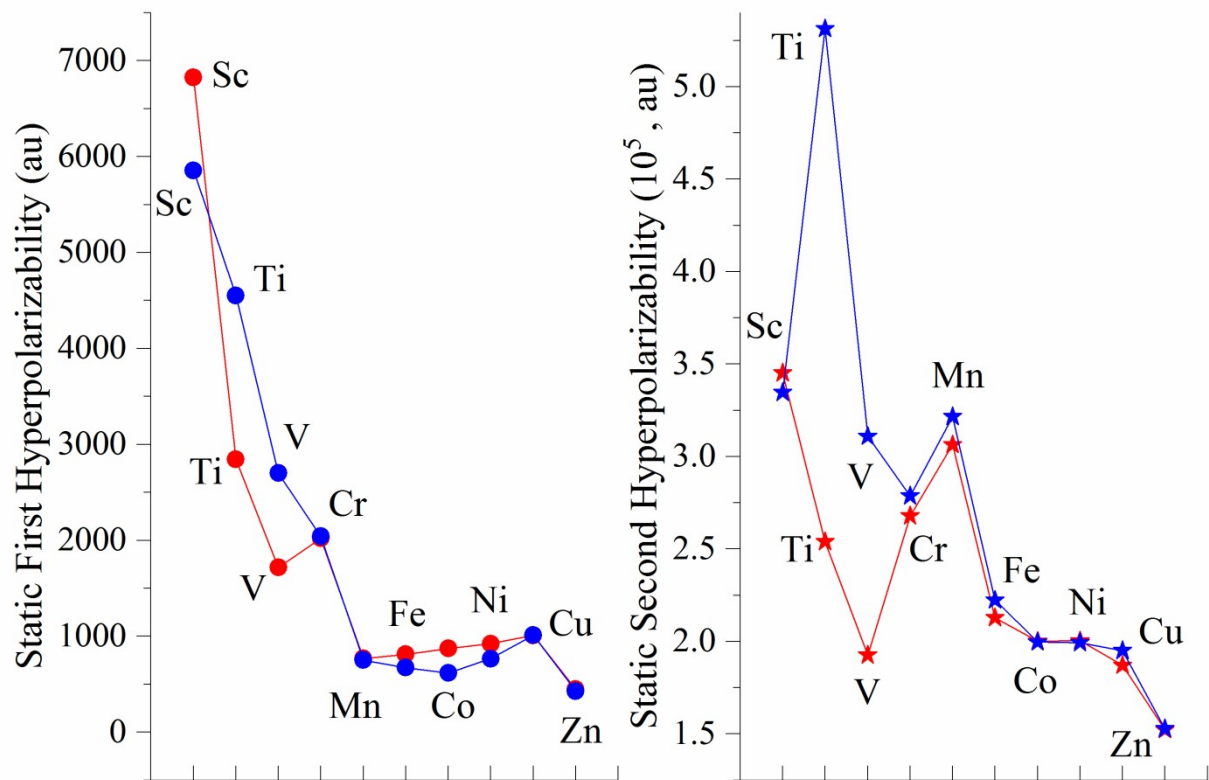

**Figure S4.** Variation of first hyperpolarizability ( $\beta_{HRS}^{\infty}$ ) and second hyperpolarizability ( $\gamma(0;0,0,0)$ ) of  $M@b_{64}Al_{12}N_{12}$  (red) and  $M@b_{66}Al_{12}N_{12}$  (blue) where M= Sc-Zn



$M@b_{64}Al_{12}N_{12}$

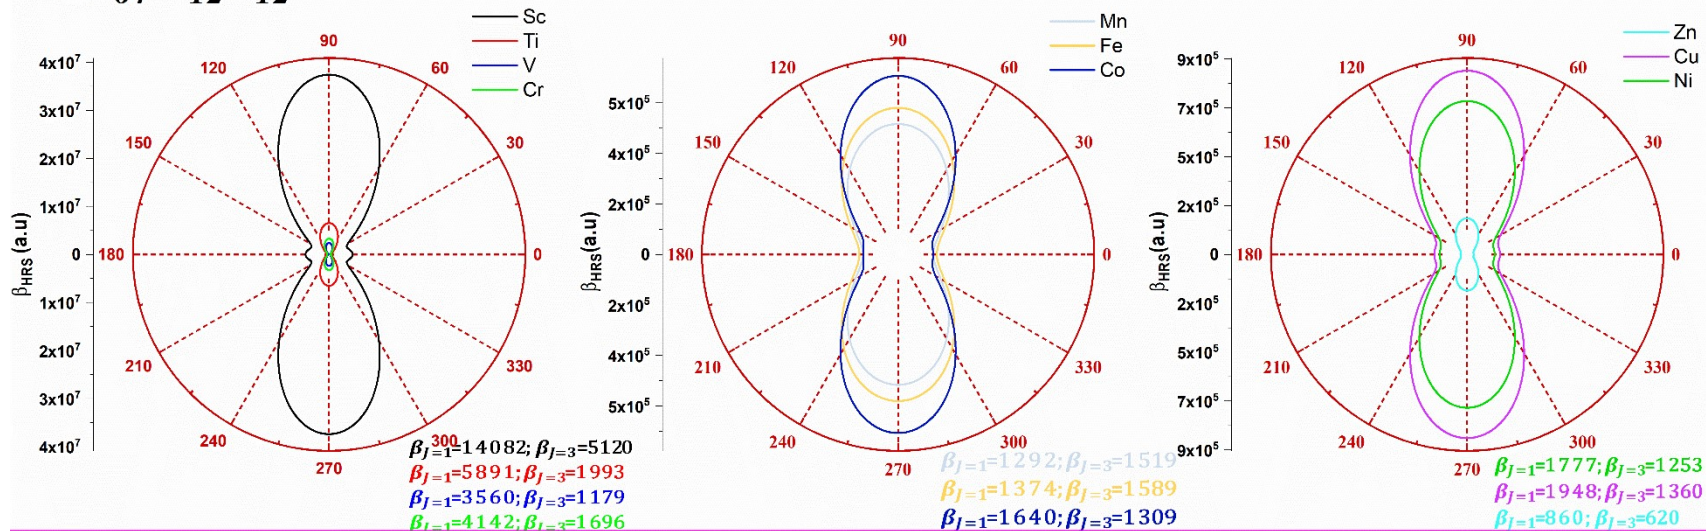

$M@b_{66}Al_{12}N_{12}$

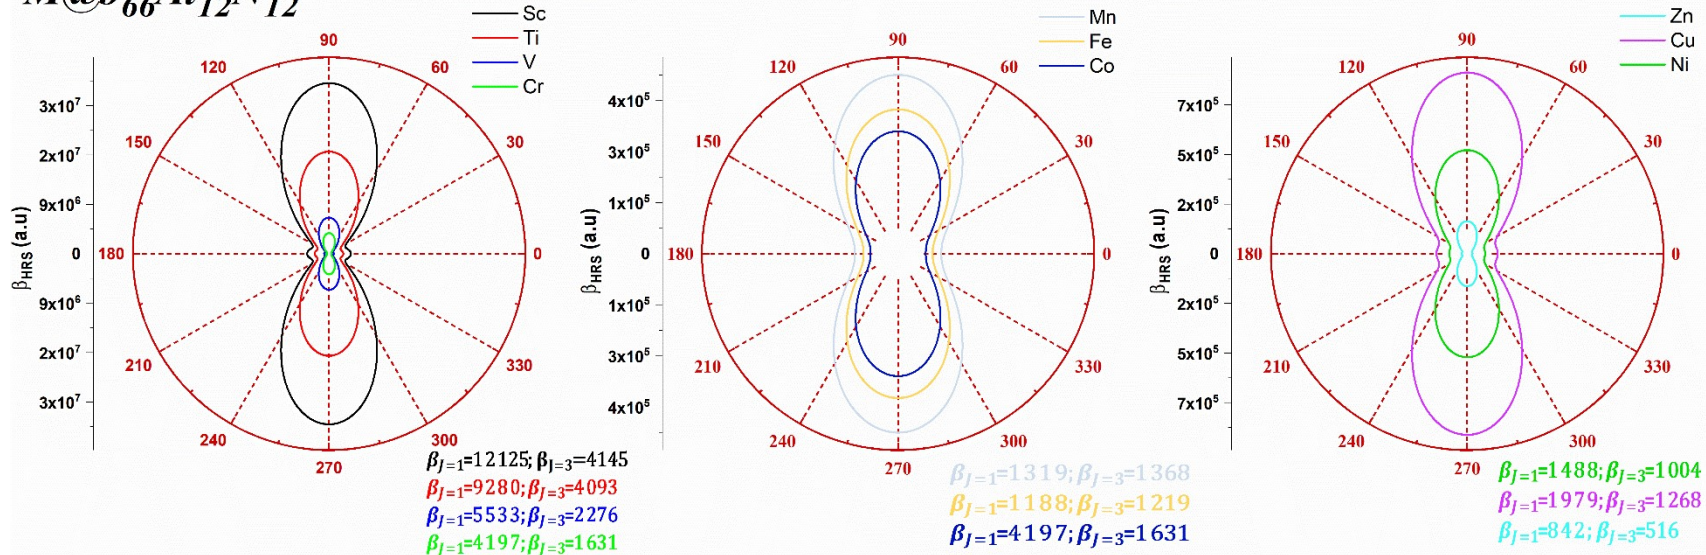

Figure S5. Relationship between  $I_{\Psi}^{2w}$  and polarization angle  $\Psi$  of  $M@b_{64/66}Al_{12}N_{12}$

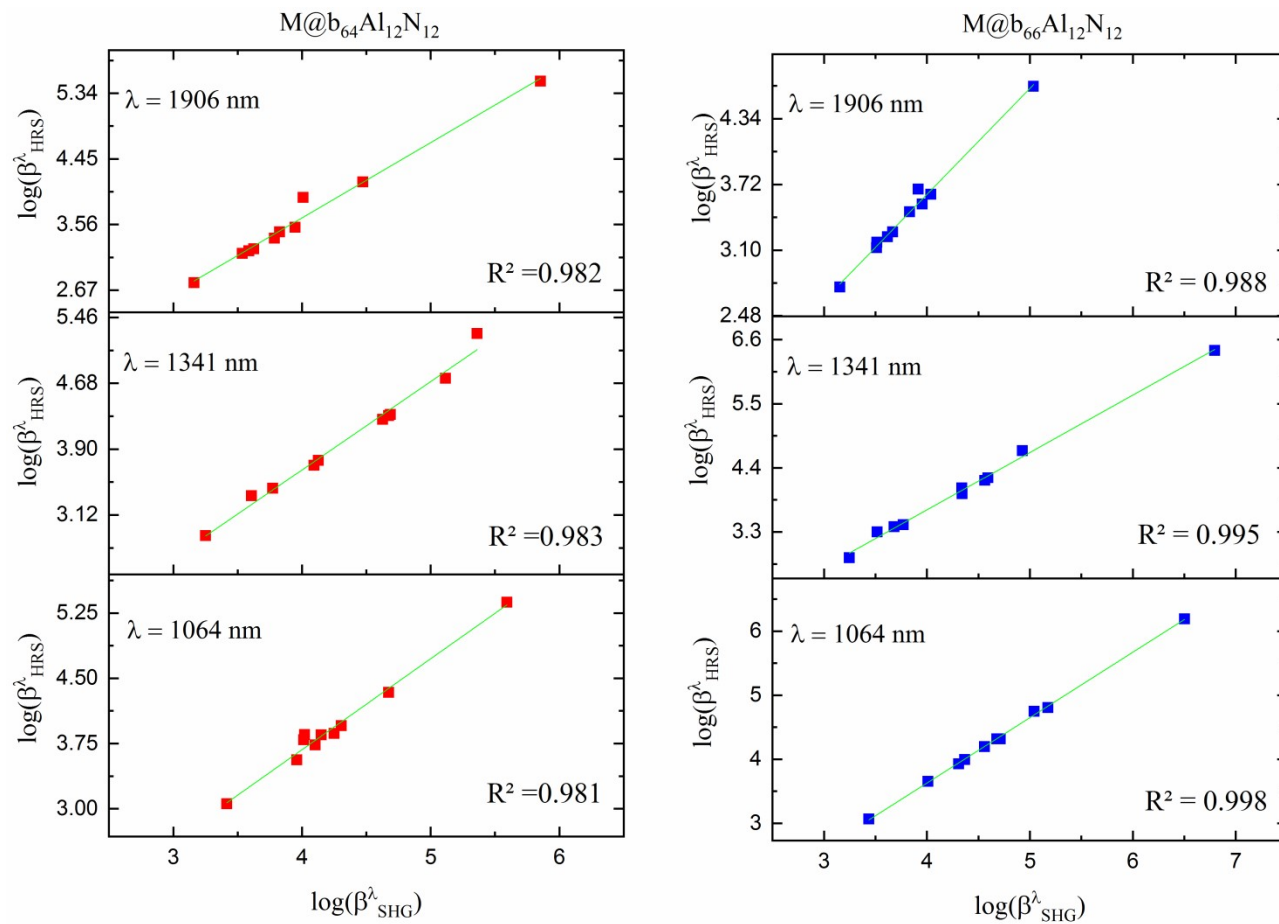

**Figure S6.** Plot of  $\beta_{HRS}^\lambda$  as a function of  $\beta_{SHG}^\lambda$  for  $M@b_{64/66}Al_{12}N_{12}$ , where M= Sc to Zn), 1906, 1341, and 1064 nm
